# Supplementary material for: Gas phase models of hydride transfer from divalent alkaline earth metals to CO2 and CH2O
Source: Royal Society of Chemistry journal article supplement (doi:10.1039/d2cp05964a), 2023-01-01
Supplement: d2cp05964a1.pdf [file d2cp05964a1.pdf]

## Gas phase models of hydride transfer from divalent alkaline earth metals to CO<sub>2</sub> and CH<sub>2</sub>O

Christian Sant Gjermestad<sup>1</sup>, Mauritz Johan Ryding<sup>2</sup> and Einar Uggerud<sup>2</sup>

<sup>1</sup> Department of Chemistry, University of Bergen, Allégaten 41, NO-5007 Bergen, Norway.

<sup>2</sup> Department of Chemistry and Hylleraas Centre for Quantum Molecular Sciences, University of Oslo, PO Box 1033, Blindern, NO-0135 Oslo, Norway.

### SUPPLEMENTARY INFORMATION

#### Electrospray solutions used in experiments

Table S1. Solutions used in the experiment in order to produce the desired ions during electrospray ionization.

| Ion to produce                                  | Solution used                                                              |
|-------------------------------------------------|----------------------------------------------------------------------------|
| CH <sub>3</sub> OMg <sup>+</sup>                | 2 mM MgCl <sub>2</sub> in MeOH or MeOH/H <sub>2</sub> O 1:1                |
| CH <sub>3</sub> OMgCl <sub>2</sub> <sup>-</sup> | 2 mM MgCl <sub>2</sub> in MeOH with 5 μL/mL Et <sub>3</sub> N              |
| HCO <sub>2</sub> Mg <sup>+</sup>                | 2 mM MgCl <sub>2</sub> and 4 mM HCOOH in MeOH or MeOH/H <sub>2</sub> O 1:1 |
| HCO <sub>2</sub> MgCl <sub>2</sub> <sup>-</sup> | 2 mM MgCl <sub>2</sub> and 4 mM HCOOH in MeOH                              |

#### Source conditions used in experiments

Table S2. Source conditions used in experiments when producing the indicated ions on the QTOF 2 instrument.

| Parameter         | CH <sub>3</sub> OMg <sup>+</sup> | HCO <sub>2</sub> Mg <sup>+</sup> | CH <sub>3</sub> OMgCl <sub>2</sub> <sup>-</sup> | HCO <sub>2</sub> MgCl <sub>2</sub> <sup>-</sup> |
|-------------------|----------------------------------|----------------------------------|-------------------------------------------------|-------------------------------------------------|
| Capillary voltage | 3.5 kV                           | 3.5 kV                           | 3.5 kV                                          | 3.5 kV                                          |
| Cone voltage      | 30 V                             | 35 V                             | 30 V                                            | 18 V                                            |
| Extractor voltage | 4 V                              | 4 V                              | 0 V                                             | 0                                               |
| Solution flow     | 20 μL min <sup>-1</sup>          | 20 μL min <sup>-1</sup>          | 20 μL min <sup>-1</sup>                         | 20 μL min <sup>-1</sup>                         |
| Nebulizer gas     | on                               | on                               | on                                              | on                                              |
| Desolvation gas   | 425 L h <sup>-1</sup>            | 350 L h <sup>-1</sup>            | 275 L h <sup>-1</sup>                           | 200 L h <sup>-1</sup>                           |
| Cone gas          | off                              | off                              | off                                             | off                                             |

## Computational method evaluation

Table S3. Energies ( $E + \text{ZPE}$ ,  $\text{kJ mol}^{-1}$ ) of the structures, **TS2A**, **5A** and **6A**, relative to  $\text{MeOMg}^+$  (**4A**) using various selected quantum chemical methods. Geometries were fully optimized with each method.

| Method  | Basis set    | TS2A | 5A  | 6A  |
|---------|--------------|------|-----|-----|
| CCSD(T) | aug-cc-pVTZ  | 100  | -28 | 165 |
| MP2     | aug-cc-pVTZ  | 116  | -8  | 184 |
| M11     | aug-cc-pVTZ  | 89   | -25 | 185 |
| wb97xd  | aug-cc-pVTZ  | 95   | -22 | 174 |
| G4      | –            | 97   | -35 | 164 |
| B3LYP   | cc-pVDZ      | 87   | -60 | 147 |
|         | cc-pVTZ      | 86   | -48 | 148 |
|         | cc-pVQZ      | 87   | -46 | 149 |
|         | aug-cc-pVDZ  | 87   | -48 | 144 |
|         | aug-cc-pVTZ  | 87   | -46 | 147 |
|         | daug-cc-pVTZ | 87   | -46 | 147 |
|         | aug-cc-pVQZ  | 88   | -45 | 149 |
|         | LANL2DZ      | 151  | –   | 195 |

## Detailed Gaussian Settings

*Intermediates:*

**# opt=(tight,calcfc,maxcycle=300) freq int=ultrafine nosymm**

*Transition states:*

**# opt=(tight,calcfc,ts,noeigentest,maxcycle=300) freq int=ultrafine nosymm**

*Intrinsic Reaction Coordinate:*

**# irc=(calcfc, tight, forward, stepsize=10, maxpoints=300, maxcycles=1000) int=ultrafine nosymm**

For low absolute values of the imaginary frequency, the *stepsize* was increased. In some cases, the local quadratic approximation was also employed in the predictor step in (*irc=LQA*).

## Extracted threshold energies

Table S4. Threshold energies ( $E_T$ ,  $\text{kJ mol}^{-1}$ ) extracted from appearance curves at different collision gas pressures ( $P_{\text{Ar}}$ ,  $10^{-4}$  mbar).

| $\text{CH}_3\text{OMg}^+$ |       | $\text{HCO}_2\text{Mg}^+$ |       | $\text{CH}_3\text{OMgCl}_2^-$ |       | $\text{HCO}_2\text{MgCl}_2^-$ |       |
|---------------------------|-------|---------------------------|-------|-------------------------------|-------|-------------------------------|-------|
| $P_{\text{Ar}}$           | $E_T$ | $P_{\text{Ar}}$           | $E_T$ | $P_{\text{Ar}}$               | $E_T$ | $P_{\text{Ar}}$               | $E_T$ |
| 1.01                      | 133   | 1.03                      | 192   | 1.04                          | 176   | 1.03                          | 183   |
| 2.03                      | 118   | 2.03                      | 182   | 2.04                          | 153   | 2.09                          | 160   |
| 3.03                      | 119   | 3.08                      | 179   | 2.86                          | 153   | 3.07                          | 155   |
| 3.87                      | 112   | 4.06                      | 174   | 3.82                          | 146   | 4.17                          | 145   |
| 5.10                      | 104   | 4.97                      | 163   | 5.14                          | 132   | 5.15                          | 136   |

Table S5. Extrapolation of threshold energies in Table S4 to zero pressure using linear regression.

| Parameter                                       | $\text{CH}_3\text{OMg}^+$ | $\text{HCO}_2\text{Mg}^+$ | $\text{CH}_3\text{OMgCl}_2^-$ | $\text{HCO}_2\text{MgCl}_2^-$ |
|-------------------------------------------------|---------------------------|---------------------------|-------------------------------|-------------------------------|
| $E_T(P_{\text{Ar}}=0)$ [ $\text{kJ mol}^{-1}$ ] | 136                       | 198                       | 181                           | 189                           |
| Slope [ $\text{kJ mol}^{-1} \text{mbar}^{-1}$ ] | $-6.35 \times 10^4$       | $-6.62 \times 10^4$       | $-9.63 \times 10^4$           | $-1.06 \times 10^5$           |
| $R^2$                                           | 0.905                     | 0.964                     | 0.905                         | 0.938                         |

## Supplementary Experiments

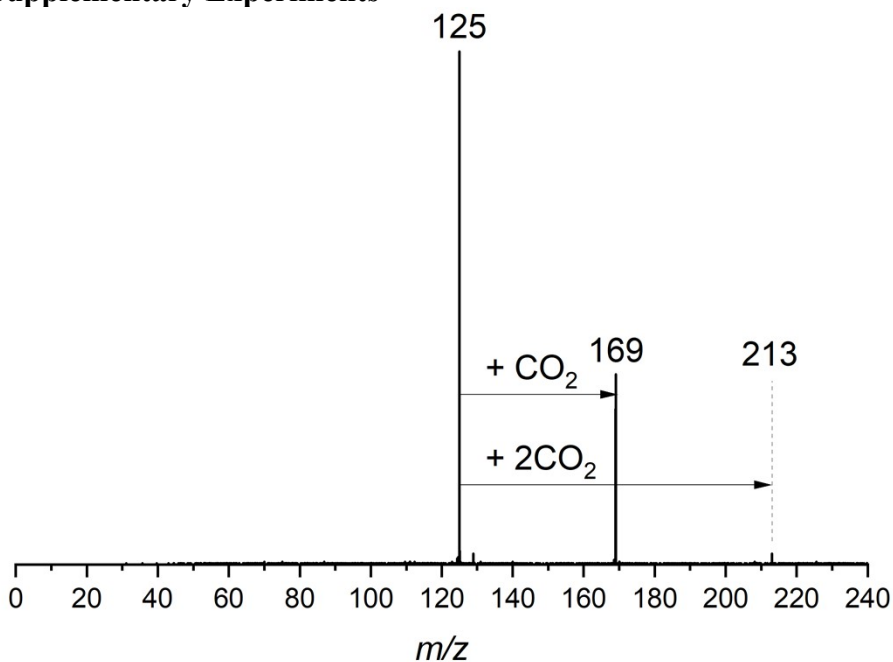

Figure S1. Reaction of  $\text{CH}_3\text{OMgCl}_2^-$  ( $m/z$  125) with  $\text{CO}_2$  ( $P_{\text{nom}} = 4.8 \times 10^{-4}$  mbar,  $E_{\text{CoM}} = 70$   $\text{kJ mol}^{-1}$ ).

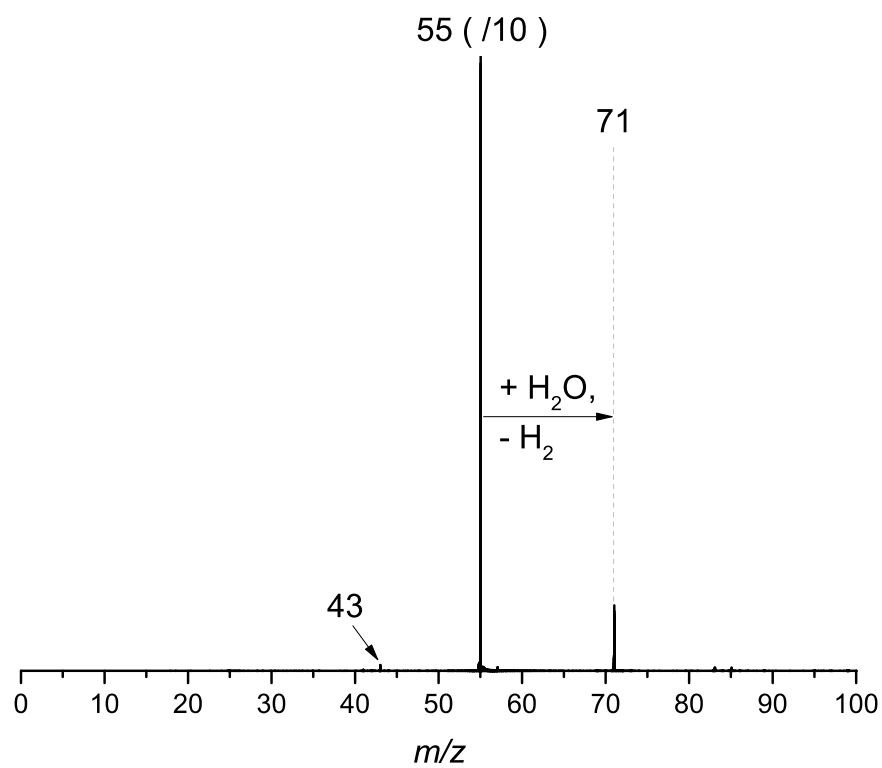

Figure S2. Reaction of  $\text{CH}_3\text{OMg}^+$  ( $m/z$  55) with  $\text{H}_2\text{O}$  ( $P_{\text{nom}} = 2.3 \times 10^{-4}$  mbar,  $E_{\text{CoM}} = 19$  kJ mol $^{-1}$ ). Note that the intensity of the reactant peak is scaled down a factor of ten.

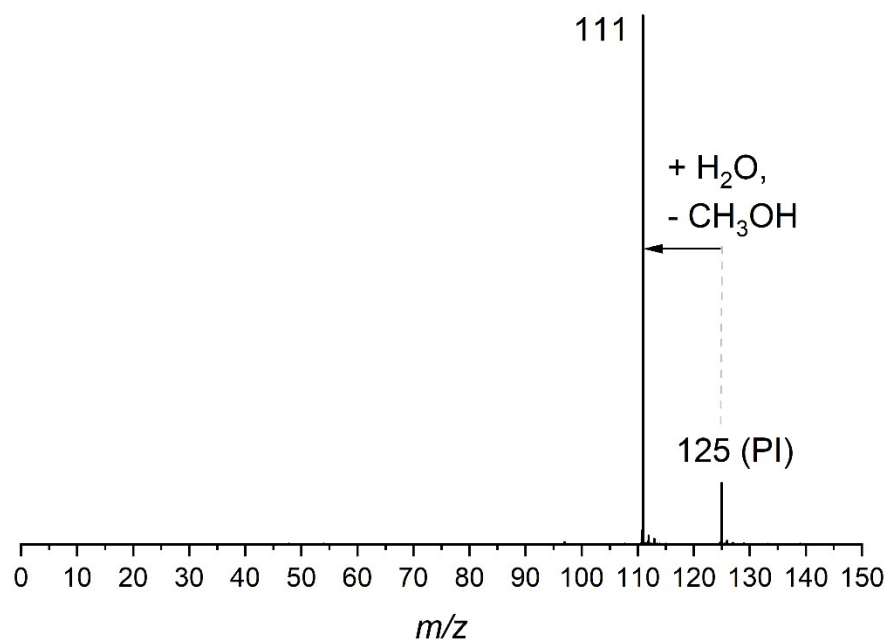

Figure S3. Reaction of  $\text{CH}_3\text{OMgCl}_2^-$  ( $m/z$  125) with  $\text{H}_2\text{O}$  ( $P_{\text{nom}} = 3.0 \times 10^{-4}$  mbar,  $E_{\text{CoM}} = 20$  kJ mol $^{-1}$ ).

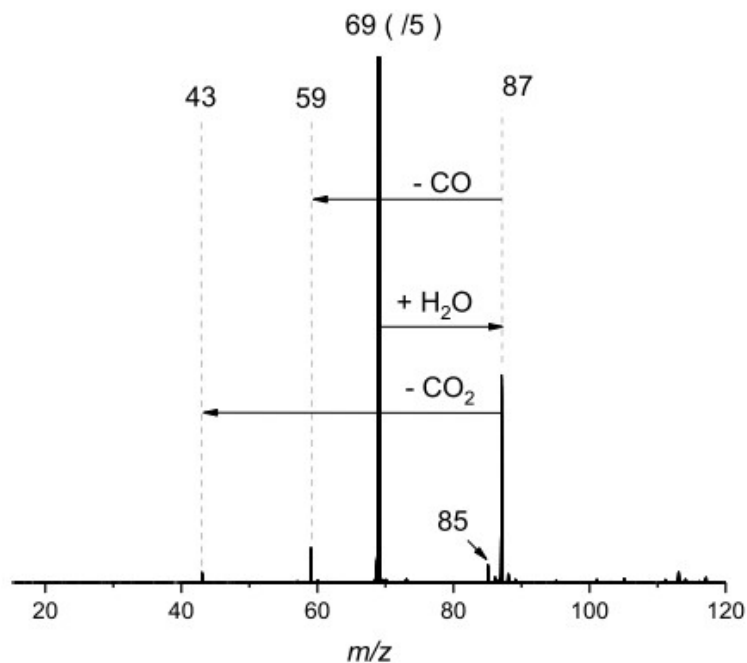

Figure S4. Reaction of  $\text{HCO}_2\text{Mg}^+$  ( $m/z$  69) with  $\text{H}_2\text{O}$  ( $P_{\text{nom}} = 1.1 \times 10^{-3}$  mbar,  $E_{\text{CoM}} = 20$  kJ mol $^{-1}$ ). Note that the intensity of the reactant peak is scaled down a factor of five.

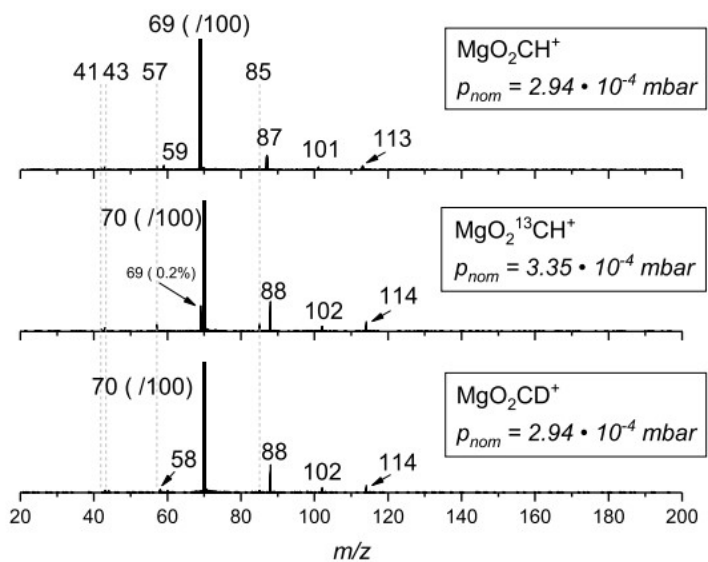

Figure S5. Isotope labelling experiments for the reaction of magnesium formate with  $\text{H}_2\text{O}$ .  $E_{\text{CoM}} = 22$  kJ mol $^{-1}$  in all three experiments.

## Supplementary computations

Table S6. Computed reaction energies for loss of formate from  $\text{HCO}_2\text{MCl}_2^-$ , M = Be, Mg, Ca, Sr, Ba. B3LYP/LANL2DZ energies in  $\text{kJ mol}^{-1}$ .

|                | <b>BeCl<sub>2</sub></b> | <b>MgCl<sub>2</sub></b> | <b>CaCl<sub>2</sub></b> | <b>SrCl<sub>2</sub></b> | <b>BaCl<sub>2</sub></b> |
|----------------|-------------------------|-------------------------|-------------------------|-------------------------|-------------------------|
| $\Delta E_r^0$ | 333                     | 371                     | 384                     | 375                     | 359                     |

As seen in Table S6, there appears to be no clear trend within the group 2 metals with regards to the binding energies of formate to  $\text{MCl}_2$ . Table 2 and Table 4 of the main text show that the effect of the metal is muted by the presence of a single chloride ligand, and more so in the presence of two; in this case, the computational method may not be able to sufficiently reproduce the expected trend. Please note that loss of formate is less favourable compared to decarboxylation for all metal dichlorides (*cf.* main text Table 2); it is most competitive in the case of  $\text{HCO}_2\text{BaCl}_2^-$ , being less favourable by only  $53 \text{ kJ mol}^{-1}$ .

Table S7. Computed trends in complexation energy ( $\Delta E_{\text{complex}}$ ) for  $\text{M}^{2+} + \text{CH}_3\text{O}^-$  with M = Be, Mg, Ca, Sr, Ba. B3LYP/LANL2DZ energies in  $\text{kJ/mol}$ .

|                             | <b>Be</b> | <b>Mg</b> | <b>Ca</b> | <b>Sr</b> | <b>Ba</b> |
|-----------------------------|-----------|-----------|-----------|-----------|-----------|
| $\Delta E_{\text{complex}}$ | -2143     | -1576     | -1267     | -1169     | -1079     |

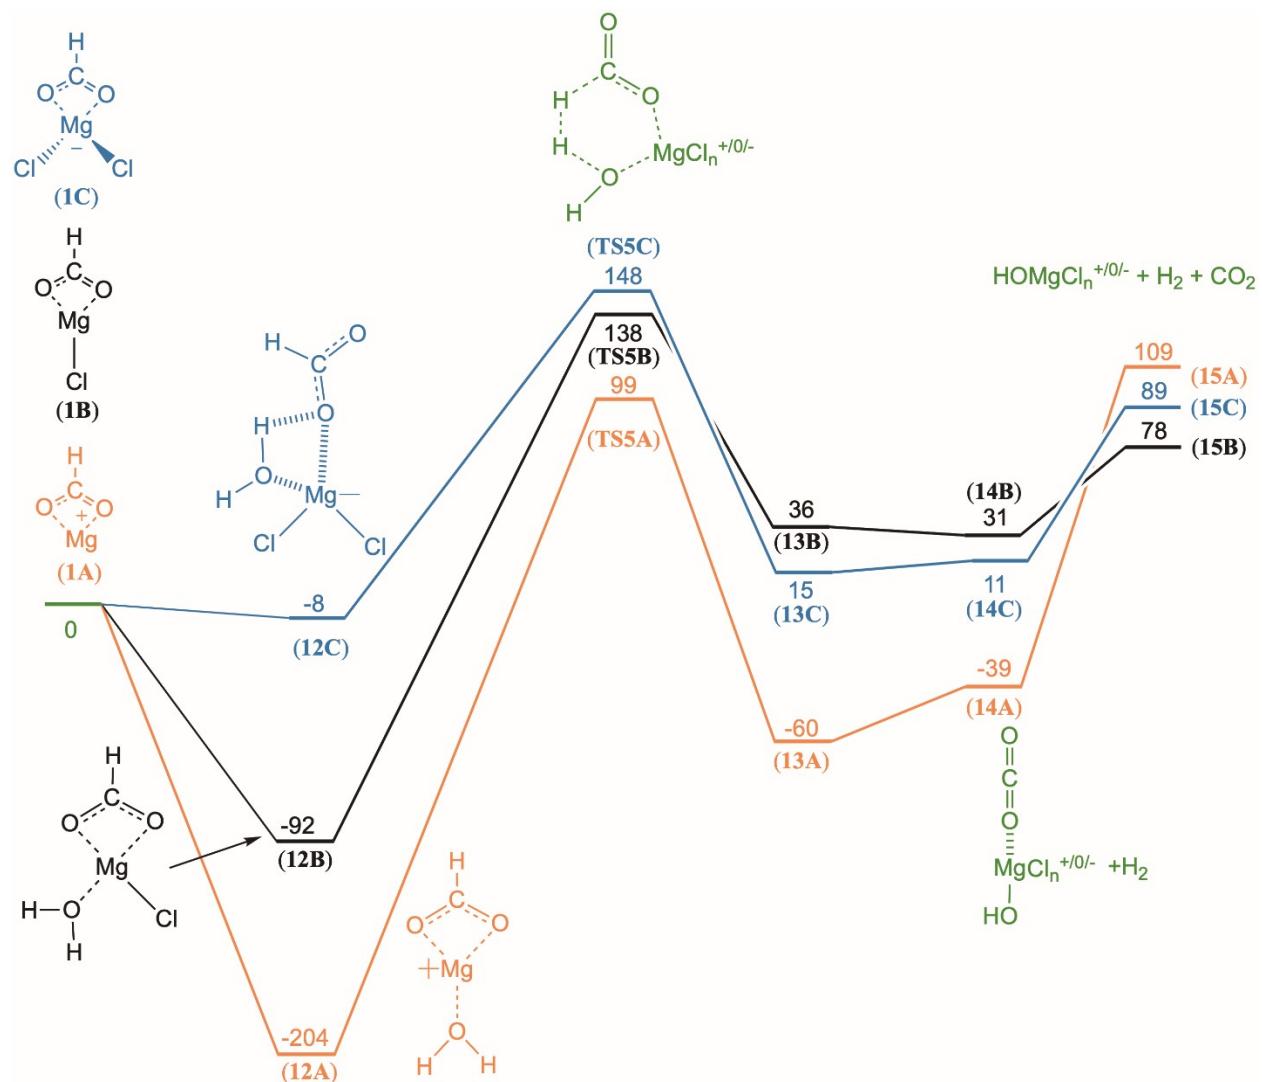

Figure S6. Potential energy diagram for reaction between  $\text{H}_2\text{O}$  and  $\text{HCO}_2\text{Mg}^+$  (orange),  $\text{HCO}_2\text{MgCl}$  (black) and  $\text{HCO}_2\text{MgCl}_2^-$  (blue), based on quantum chemical computations (G4, 0K). Relative energies given in  $\text{kJ mol}^{-1}$ .

## Absolute energies

Table S8. Absolute energies of the structures in Fig. 1 of the main text concerning the thermochemistry of hydride transfer to CO<sub>2</sub> and CH<sub>2</sub>O from HMgCl<sub>n</sub>. Energies in Hartree at 298 K unless otherwise noted.

|                        | <b>G4 (0 K)</b> | <b>G4 Energy</b> | <b>G4 Enthalpy</b> | <b>G4 Free Energy</b> |
|------------------------|-----------------|------------------|--------------------|-----------------------|
| <b>H-</b>              | -0.514955       | -0.513539        | -0.512595          | -0.524955             |
| <b>Mg2+</b>            | -199.079467     | -199.078050      | -199.077106        | -199.093956           |
| <b>MgCl+</b>           | -659.764700     | -659.762141      | -659.761196        | -659.786833           |
| <b>MgCl2</b>           | -1120.241218    | -1120.236915     | -1120.235971       | -1120.266650          |
| <b>CO2</b>             | -188.535267     | -188.532654      | -188.53171         | -188.55596            |
| <b>HCO2-</b>           | -189.147026     | -189.144052      | -189.143108        | -189.170822           |
| <b>HCO2MgCl2- (1C)</b> | -1309.516913    | -1309.509179     | -1309.508235       | -1309.550969          |
| <b>HCO2MgCl (1B)</b>   | -849.269016     | -849.263306      | -849.262362        | -849.299350           |
| <b>HCO2Mg2+ (1A)</b>   | -388.812061     | -388.808289      | -388.807345        | -388.838331           |
| <b>HMgCl2- (3C)</b>    | -1120.901001    | -1120.896201     | -1120.895257       | -1120.929933          |
| <b>HMgCl (3B)</b>      | -660.660238     | -660.656842      | -660.655898        | -660.683050           |
| <b>HMg+ (3A)</b>       | -200.206834     | -200.204472      | -200.203527        | -200.224676           |
| <b>CH2O</b>            | -114.453193     | -114.450324      | -114.449379        | -114.4748             |
| <b>CH3O-</b>           | -115.043175     | -115.040278      | -115.039334        | -115.065397           |
| <b>CH3OMgCl2- (4C)</b> | -1235.434370    | -1235.426211     | -1235.425267       | -1235.470025          |
| <b>CH3OMgCl (4B)</b>   | -775.189309     | -775.183080      | -775.182135        | -775.219673           |
| <b>CH3OMg+ (4A)</b>    | -314.722500     | -314.718011      | -314.717067        | -314.749131           |

Table S9. Absolute energies of the structures in Fig. 4 of the main text, involving decarboxylation of magnesium formates. Energies in Hartree at 298 K unless otherwise noted.

|                  | <b>G4 (0 K)</b> | <b>G4 Energy</b> | <b>G4 Enthalpy</b> | <b>G4 Free Energy</b> |
|------------------|-----------------|------------------|--------------------|-----------------------|
| <b>CO2</b>       | -188.535267     | -188.532654      | -188.53171         | -188.55596            |
| <b>1A</b>        | -388.812061     | -388.808289      | -388.807345        | -388.838331           |
| <b>1B</b>        | -849.269016     | -849.263306      | -849.262362        | -849.299350           |
| <b>1C</b>        | -1309.516913    | -1309.509179     | -1309.508235       | -1309.550969          |
| <b>TS1primeA</b> | -388.738457     | -388.734712      | -388.733768        | -388.764980           |
| <b>TS1A</b>      | -388.737291     | -388.733371      | -388.732427        | -388.763873           |
| <b>TS1B</b>      | -849.195323     | -849.189416      | -849.188471        | -849.226069           |
| <b>TS1C</b>      | -1309.442643    | -1309.434634     | -1309.433690       | -1309.478217          |
| <b>2A</b>        | -388.788280     | -388.782849      | -388.781905        | -388.810128           |
| <b>2B</b>        | -849.208156     | -849.201251      | -849.200307        | -849.240765           |
| <b>2C</b>        | -1309.443240    | -1309.434328     | -1309.433383       | -1309.481062          |
| <b>3A</b>        | -200.206834     | -200.204472      | -200.203527        | -200.224676           |
| <b>3B</b>        | -660.660238     | -660.656842      | -660.655898        | -660.683050           |
| <b>3C</b>        | -1120.901001    | -1120.896201     | -1120.895257       | -1120.929933          |



Table S10. Absolute energies of the structures in Fig. 6 of the main text, involving deformylation of magnesium methoxides. Energies in Hartree at 298 K unless otherwise noted.

|             | <b>G4 (0 K)</b> | <b>G4 Energy</b> | <b>G4 Enthalpy</b> | <b>G4 Free Energy</b> |
|-------------|-----------------|------------------|--------------------|-----------------------|
| <b>CH2O</b> | -114.453193     | -114.450324      | -114.449379        | -114.4748             |
| <b>4A</b>   | -314.722500     | -314.718011      | -314.717067        | -314.749131           |
| <b>4B</b>   | -775.189309     | -775.183080      | -775.182135        | -775.219673           |
| <b>4C</b>   | -1235.434370    | -1235.426211     | -1235.425267       | -1235.470025          |
| <b>TS2A</b> | -314.685742     | -314.682000      | -314.681056        | -314.711151           |
| <b>TS2B</b> | -775.125964     | -775.119884      | -775.118940        | -775.156271           |
| <b>TS2C</b> | -1235.360257    | -1235.352446     | -1235.351502       | -1235.394163          |
| <b>5A</b>   | -314.735854     | -314.730219      | -314.729274        | -314.762991           |
| <b>5B</b>   | -775.141764     | -775.135127      | -775.134183        | -775.172365           |
| <b>5C</b>   | -1235.368379    | -1235.359596     | -1235.358652       | -1235.403736          |
| <b>6A</b>   | -200.206834     | -200.204472      | -200.203527        | -200.224676           |
| <b>6B</b>   | -660.660238     | -660.656842      | -660.655898        | -660.683050           |
| <b>6C</b>   | -1120.901001    | -1120.896201     | -1120.895257       | -1120.929933          |

Table S11. Absolute energies of the structures referenced in Table 1 of the main text, involving substitution of Cl with other halides. B3LYP/LANL2DZ energies in Hartree.

|                     | <b>E(0K) = E + ZPE</b> | <b>E(298K) = E + Sum of thermal energies</b> | <b>H(298K) = E + Sum of thermal enthalpies</b> | <b>G(298K) = E + Sum of thermal free energies</b> |
|---------------------|------------------------|----------------------------------------------|------------------------------------------------|---------------------------------------------------|
| <b>CH2O</b>         | -114.456963            | -114.454094                                  | -114.453149                                    | -114.478670                                       |
| <b>CO2</b>          | -188.529226            | -188.526548                                  | -188.525604                                    | -188.549995                                       |
| <b>HCO2MgF</b>      | -289.946018            | -289.940432                                  | -289.939488                                    | -289.975498                                       |
| <b>HCO2MgCl</b>     | -205.043324            | -205.037483                                  | -205.036538                                    | -205.073931                                       |
| <b>HCO2MgBr</b>     | -203.258163            | -203.252176                                  | -203.251231                                    | -203.289935                                       |
| <b>HCO2MgI</b>      | -201.472504            | -201.466431                                  | -201.465487                                    | -201.505090                                       |
| <b>TS_HCO2MgF</b>   | -289.868306            | -289.862553                                  | -289.861608                                    | -289.898121                                       |
| <b>TS_HCO2MgCl</b>  | -204.965644            | -204.959625                                  | -204.958681                                    | -204.996582                                       |
| <b>TS_HCO2MgBr</b>  | -203.180336            | -203.174157                                  | -203.173213                                    | -203.212474                                       |
| <b>TS_HCO2MgI</b>   | -201.394513            | -201.388241                                  | -201.387297                                    | -201.427477                                       |
| <b>HMgF</b>         | -101.334435            | -101.331142                                  | -101.330198                                    | -101.356134                                       |
| <b>HMgCl</b>        | -16.432154             | -16.428690                                   | -16.427746                                     | -16.455079                                        |
| <b>HMgBr</b>        | -14.647265             | -14.643703                                   | -14.642759                                     | -14.671420                                        |
| <b>HMgI</b>         | -12.861590             | -12.857978                                   | -12.857034                                     | -12.886560                                        |
| <b>HCO2MgF2</b>     | -389.954495            | -389.947313                                  | -389.946369                                    | -389.986399                                       |
| <b>HCO2MgCl2</b>    | -220.164898            | -220.157090                                  | -220.156146                                    | -220.199096                                       |
| <b>HCO2MgBr2</b>    | -216.596201            | -216.588024                                  | -216.587079                                    | -216.632880                                       |
| <b>HCO2MgI2</b>     | -213.026577            | -213.018201                                  | -213.017257                                    | -213.064982                                       |
| <b>TS_HCO2MgF2</b>  | -389.865458            | -389.857872                                  | -389.856928                                    | -389.900223                                       |
| <b>TS_HCO2MgCl2</b> | -220.079055            | -220.070713                                  | -220.069769                                    | -220.117596                                       |
| <b>TS_HCO2MgBr2</b> | -216.511463            | -216.502918                                  | -216.501974                                    | -216.550849                                       |
| <b>TS_HCO2MgI2</b>  | -212.942805            | -212.934073                                  | -212.933129                                    | -212.983906                                       |
| <b>HMgF2</b>        | -201.325870            | -201.321701                                  | -201.320757                                    | -201.351631                                       |
| <b>HMgCl2</b>       | -31.542071             | -31.537311                                   | -31.536367                                     | -31.570353                                        |
| <b>HMgBr2</b>       | -27.976143             | -27.971056                                   | -27.970112                                     | -28.007618                                        |
| <b>HMgI2</b>        | -24.408400             | -24.403114                                   | -24.402170                                     | -24.440959                                        |
| <b>MeOMgF</b>       | -215.880152            | -215.874245                                  | -215.873301                                    | -215.909132                                       |
| <b>MeOMgCl</b>      | -130.979480            | -130.973344                                  | -130.972399                                    | -131.009579                                       |
| <b>MeOMgBr</b>      | -129.195188            | -129.188931                                  | -129.187987                                    | -129.226397                                       |
| <b>MeOMgI</b>       | -127.410329            | -127.404005                                  | -127.403061                                    | -127.442324                                       |
| <b>TS_MeOMgF</b>    | -215.805075            | -215.799116                                  | -215.798172                                    | -215.834793                                       |
| <b>TS_MeOMgCl</b>   | -130.903388            | -130.897261                                  | -130.896316                                    | -130.933857                                       |
| <b>TS_MeOMgBr</b>   | -129.118205            | -129.111917                                  | -129.110973                                    | -129.149937                                       |
| <b>TS_MeOMgI</b>    | -127.332453            | -127.326059                                  | -127.325115                                    | -127.365089                                       |
| <b>MeOMgF2</b>      | -315.877709            | -315.870100                                  | -315.869156                                    | -315.912983                                       |
| <b>MeOMgCl2</b>     | -146.092474            | -146.084263                                  | -146.083319                                    | -146.129616                                       |
| <b>MeOMgBr2</b>     | -142.525117            | -142.516544                                  | -142.515600                                    | -142.564801                                       |

|                    |             |             |             |             |
|--------------------|-------------|-------------|-------------|-------------|
| <b>MeOMgI2</b>     | -138.956915 | -138.948152 | -138.947208 | -138.998284 |
| <b>TS_MeOMgF2</b>  | -315.791731 | -315.784656 | -315.783712 | -315.824285 |
| <b>TS_MeOMgCl2</b> | -146.004502 | -145.996865 | -145.995921 | -146.038119 |
| <b>TS_MeOMgBr2</b> | -142.437956 | -142.429946 | -142.429002 | -142.474180 |
| <b>TS_MeOMgI2</b>  | -138.870373 | -138.862160 | -138.861216 | -138.908368 |

Table S12. Absolute energies of the structures referenced in Table 2 of the main text, involving substitution of Mg with other earth alkali metals in formate complexes. B3LYP/LANL2DZ energies in Hartree.

|                    | <b>E(0K) = E + ZPE</b> | <b>E(298K) = E + Sum of thermal energies</b> | <b>H(298K) = E + Sum of thermal enthalpies</b> | <b>G(298K) = E + Sum of thermal free energies</b> |
|--------------------|------------------------|----------------------------------------------|------------------------------------------------|---------------------------------------------------|
| <b>HCO2Be</b>      | -203.551483            | -203.547947                                  | -203.547003                                    | -203.576633                                       |
| <b>HCO2Mg</b>      | -189.716447            | -189.712568                                  | -189.711624                                    | -189.742857                                       |
| <b>HCO2Ca</b>      | -225.492190            | -225.488059                                  | -225.487114                                    | -225.519615                                       |
| <b>HCO2Sr</b>      | -219.390665            | -219.386391                                  | -219.385447                                    | -219.419251                                       |
| <b>HCO2Ba</b>      | -214.198691            | -214.194296                                  | -214.193351                                    | -214.228109                                       |
| <b>TS_HCO2Be</b>   | -203.480391            | -203.476838                                  | -203.475893                                    | -203.505725                                       |
| <b>TS_HCO2Mg</b>   | -189.640015            | -189.636010                                  | -189.635066                                    | -189.666702                                       |
| <b>TS_HCO2Ca</b>   | -225.412901            | -225.408515                                  | -225.407571                                    | -225.440706                                       |
| <b>TS_HCO2Sr</b>   | -219.308506            | -219.303926                                  | -219.302982                                    | -219.337547                                       |
| <b>TS_HCO2Ba</b>   | -214.111420            | -214.106654                                  | -214.105710                                    | -214.141356                                       |
| <b>HBe</b>         | -14.940525             | -14.938164                                   | -14.937220                                     | -14.956602                                        |
| <b>HMg</b>         | -1.112764              | -1.110402                                    | -1.109457                                      | -1.130604                                         |
| <b>HCa</b>         | -36.871681             | -36.869309                                   | -36.868365                                     | -36.890642                                        |
| <b>HSr</b>         | -30.765515             | -30.763137                                   | -30.762193                                     | -30.785714                                        |
| <b>HBa</b>         | -25.564989             | -25.562603                                   | -25.561659                                     | -25.585977                                        |
| <b>HCO2BeCl</b>    | -218.936289            | -218.931156                                  | -218.930212                                    | -218.965183                                       |
| <b>HCO2CaCl</b>    | -240.770972            | -240.764657                                  | -240.763712                                    | -240.803229                                       |
| <b>HCO2SrCl</b>    | -234.647725            | -234.641117                                  | -234.640173                                    | -234.681492                                       |
| <b>HCO2BaCl</b>    | -229.435150            | -229.428339                                  | -229.427395                                    | -229.470062                                       |
| <b>TS_HCO2BeCl</b> | -218.865710            | -218.860530                                  | -218.859586                                    | -218.894804                                       |
| <b>TS_HCO2CaCl</b> | -240.687193            | -240.680571                                  | -240.679627                                    | -240.719824                                       |
| <b>TS_HCO2SrCl</b> | -234.559824            | -234.552973                                  | -234.552029                                    | -234.593739                                       |
| <b>HBeCl</b>       | -30.341556             | -30.338730                                   | -30.337786                                     | -30.362736                                        |
| <b>HCaCl</b>       | -52.143767             | -52.139971                                   | -52.139027                                     | -52.161953                                        |
| <b>HSrCl</b>       | -46.012234             | -46.008248                                   | -46.007304                                     | -46.039401                                        |
| <b>HBaCl</b>       | -40.792548             | -40.788424                                   | -40.787480                                     | -40.820951                                        |
| <b>HCO2BeCl2</b>   | -234.056156            | -234.048807                                  | -234.047863                                    | -234.091206                                       |
| <b>HCO2CaCl2</b>   | -255.891992            | -255.883653                                  | -255.882709                                    | -255.927840                                       |
| <b>HCO2SrCl2</b>   | -249.764956            | -249.756233                                  | -249.755289                                    | -249.802262                                       |
| <b>HCO2BaCl2</b>   | -244.546175            | -244.537160                                  | -244.536215                                    | -244.584872                                       |

|                     |             |             |             |             |
|---------------------|-------------|-------------|-------------|-------------|
| <b>TS_HCO2BeCl2</b> | -233.978232 | -233.970834 | -233.969890 | -234.014795 |
| <b>TS_HCO2CaCl2</b> | -255.796283 | -255.787762 | -255.786818 | -255.832861 |
| <b>TS_HCO2SrCl2</b> | -249.665585 | -249.656699 | -249.655755 | -249.703406 |
| <b>TS_HCO2BaCl2</b> | -244.442275 | -244.433105 | -244.432161 | -244.481141 |
| <b>HBeCl2</b>       | -45.441499  | -45.437472  | -45.436528  | -45.468128  |
| <b>HCaCl2</b>       | -67.255811  | -67.250509  | -67.249565  | -67.286199  |
| <b>HSrCl2</b>       | -61.124400  | -61.118778  | -61.117834  | -61.156187  |
| <b>HBaCl2</b>       | -55.900454  | -55.894607  | -55.893663  | -55.933334  |

Table S13. Absolute energies of the structures referenced in Table 3 of the main text, involving decomposition of reaction energies. B3LYP/LANL2DZ energies in Hartree.

|        | <b>E(0K) = E + ZPE</b> | <b>E(298K) = E + Sum of thermal energies</b> | <b>H(298K) = E + Sum of thermal enthalpies</b> | <b>G(298K) = E + Sum of thermal free energies</b> |
|--------|------------------------|----------------------------------------------|------------------------------------------------|---------------------------------------------------|
| Be(0)  | -14.670226             | -14.66881                                    | -14.667866                                     | -14.683329                                        |
| Mg(0)  | -0.819916              | -0.8185                                      | -0.817555                                      | -0.834405                                         |
| Ca(0)  | -36.550702             | -36.549286                                   | -36.548341                                     | -36.565914                                        |
| Sr(0)  | -30.433996             | -30.43258                                    | -30.431636                                     | -30.450325                                        |
| Ba(0)  | -25.215875             | -25.214458                                   | -25.213514                                     | -25.232841                                        |
| Be(2+) | -13.652907             | -13.651491                                   | -13.650547                                     | -13.66601                                         |
| Mg(2+) | 0                      | 0.001416                                     | 0.00236                                        | -0.014489                                         |
| Ca(2+) | -35.881534             | -35.880118                                   | -35.879174                                     | -35.896746                                        |
| Sr(2+) | -29.81157              | -29.810154                                   | -29.809209                                     | -29.827898                                        |
| Ba(2+) | -24.651771             | -24.650355                                   | -24.649411                                     | -24.668737                                        |

Table S14. Absolute energies of the structures referenced in Table 4 of the main text, involving substitution of Mg with other earth alkali metals in methoxy complexes. B3LYP/LANL2DZ energies in Hartree.

|                 | <b>E(0K) = E + ZPE</b> | <b>E(298K) = E + Sum of thermal energies</b> | <b>H(298K) = E + Sum of thermal enthalpies</b> | <b>G(298K) = E + Sum of thermal free energies</b> |
|-----------------|------------------------|----------------------------------------------|------------------------------------------------|---------------------------------------------------|
| <b>MeOBe</b>    | -129.523356            | -129.519441                                  | -129.518497                                    | -129.547605                                       |
| <b>MeOMg</b>    | -115.654048            | -115.649652                                  | -115.648708                                    | -115.680209                                       |
| <b>MeOCa</b>    | -151.418115            | -151.413770                                  | -151.412826                                    | -151.444751                                       |
| <b>MeOSr</b>    | -145.310574            | -145.306098                                  | -145.305154                                    | -145.338421                                       |
| <b>MeOBa</b>    | -140.116593            | -140.112153                                  | -140.111208                                    | -140.144953                                       |
| <b>TS_MeOBe</b> | -129.466766            | -129.463480                                  | -129.462536                                    | -129.490717                                       |
| <b>TS_MeOMg</b> | -115.596698            | -115.592976                                  | -115.592032                                    | -115.622124                                       |
| <b>TS_MeOCa</b> | -151.362715            | -151.358612                                  | -151.357667                                    | -151.389260                                       |
| <b>TS_MeOSr</b> | -145.256106            | -145.251752                                  | -145.250807                                    | -145.283946                                       |
| <b>TS_MeOBa</b> | -140.057467            | -140.052723                                  | -140.051778                                    | -140.086496                                       |
| <b>MeOBeCl</b>  | -144.908912            | -144.903489                                  | -144.902545                                    | -144.937423                                       |
| <b>MeOCaCl</b>  | -166.691461            | -166.685046                                  | -166.684102                                    | -166.722914                                       |

|                    |             |             |             |             |
|--------------------|-------------|-------------|-------------|-------------|
| <b>MeOSrCl</b>     | -160.563293 | -160.556653 | -160.555708 | -160.596183 |
| <b>MeOBaCl</b>     | -155.348236 | -155.341454 | -155.340510 | -155.382193 |
| <b>TS_MeOBeCl</b>  | -144.803337 | -144.798271 | -144.797327 | -144.831468 |
| <b>TS_MeOCaCl</b>  | -166.625004 | -166.618354 | -166.617410 | -166.657014 |
| <b>TS_MeOSrCl</b>  | -160.497820 | -160.490879 | -160.489935 | -160.531286 |
| <b>TS_MeOBaCl</b>  | -155.279201 | -155.272094 | -155.271150 | -155.313739 |
| <b>MeOBeCl2</b>    | -159.999404 | -159.992437 | -159.991493 | -160.032004 |
| <b>MeOCaCl2</b>    | -181.807420 | -181.798894 | -181.797950 | -181.846640 |
| <b>MeOSrCl2</b>    | -175.676280 | -175.667421 | -175.666477 | -175.716432 |
| <b>MeOBaCl2</b>    | -170.455070 | -170.445988 | -170.445044 | -170.495978 |
| <b>TS_MeOBeCl2</b> | -159.895883 | -159.889018 | -159.888074 | -159.929596 |
| <b>TS_MeOCaCl2</b> | -181.728328 | -181.720078 | -181.719134 | -181.763220 |
| <b>TS_MeOSrCl2</b> | -175.598785 | -175.590163 | -175.589218 | -175.634958 |
| <b>TS_MeOBaCl2</b> | -170.376601 | -170.367691 | -170.366747 | -170.413922 |

Table S15. Absolute energies of the structures in Fig. 9 of the main text, involving reaction of magnesium methoxides with carbon dioxide. Energies in Hartree at 298 K unless otherwise noted.

|                | <b>G4 (0 K)</b> | <b>G4 Energy</b> | <b>G4 Enthalpy</b> | <b>G4 Free Energy</b> |
|----------------|-----------------|------------------|--------------------|-----------------------|
| <b>7A</b>      | -503.313533     | -503.305196      | -503.304252        | -503.348113           |
| <b>7B</b>      | -963.749960     | -963.741458      | -963.740514        | -963.784939           |
| <b>7C</b>      | -1423.978740    | -1423.966283     | -1423.965339       | -1424.022965          |
| <b>7Cprime</b> | -1424.00469     | -1423.99417      | -1423.99323        | -1424.04359           |
| <b>TS3A</b>    | -503.259001     | -503.252746      | -503.251802        | -503.289620           |
| <b>TS3B</b>    | -963.703806     | -963.695613      | -963.694669        | -963.738327           |
| <b>TS3C</b>    | -1423.950360    | -1423.940049     | -1423.939105       | -1423.988619          |
| <b>8A</b>      | -503.346961     | -503.338980      | -503.338036        | -503.381061           |
| <b>8B</b>      | -963.753249     | -963.743765      | -963.742821        | -963.789350           |
| <b>8C</b>      | -1423.977068    | -1423.965399     | -1423.964455       | -1424.017451          |

Table S16. Absolute energies of the structures in Fig. 10 of the main text, involving reaction of magnesium methoxides with water. Energies in Hartree at 298 K unless otherwise noted.

|             | <b>G4 (0 K)</b> | <b>G4 Energy</b> | <b>G4 Enthalpy</b> | <b>G4 Free Energy</b> |
|-------------|-----------------|------------------|--------------------|-----------------------|
| <b>H2O</b>  | -76.397253      | -76.394418       | -76.393474         | -76.415555            |
| <b>9A</b>   | -391.201266     | -391.193517      | -391.192573        | -391.234962           |
| <b>9B</b>   | -851.620445     | -851.611837      | -851.610893        | -851.654991           |
| <b>9C</b>   | -1311.855775    | -1311.845314     | -1311.844370       | -1311.894451          |
| <b>TS4A</b> | -391.133429     | -391.127497      | -391.126553        | -391.162322           |
| <b>TS4B</b> | -851.559099     | -851.550876      | -851.549932        | -851.593332           |
| <b>TS4C</b> | -1311.789680    | -1311.780040     | -1311.779096       | -1311.825484          |

|            |              |              |              |              |
|------------|--------------|--------------|--------------|--------------|
| <b>10A</b> | -391.180219  | -391.171224  | -391.170280  | -391.213668  |
| <b>10B</b> | -851.585933  | -851.575369  | -851.574425  | -851.622647  |
| <b>10C</b> | -1311.812293 | -1311.800232 | -1311.799288 | -1311.851587 |
| <b>11A</b> | -390.005535  | -389.997971  | -389.997026  | -390.037123  |
| <b>11B</b> | -850.419729  | -850.411901  | -850.410957  | -850.452341  |
| <b>11C</b> | -1310.645494 | -1310.635685 | -1310.634741 | -1310.681760 |

Table S17. Absolute energies of the structures in Fig. S6, involving reaction of magnesium formates and H<sub>2</sub>O. Energies in Hartree at 298 K unless otherwise is noted.

|             | <b>G4 (0 K)</b> | <b>G4 Energy</b> | <b>G4 Enthalpy</b> | <b>G4 Free Energy</b> |
|-------------|-----------------|------------------|--------------------|-----------------------|
| <b>H2</b>   | -1.16802        | -1.16566         | -1.164715          | -1.179507             |
| <b>12A</b>  | -465.287074     | -465.280165      | -465.279220        | -465.318409           |
| <b>12B</b>  | -925.701153     | -925.692416      | -925.691472        | -925.735642           |
| <b>12C</b>  | -1385.917158    | -1385.906259     | -1385.905315       | -1385.956164          |
| <b>TS5A</b> | -465.171475     | -465.165295      | -465.164350        | -465.201319           |
| <b>TS5B</b> | -925.613718     | -925.605329      | -925.604385        | -925.648133           |
| <b>TS5C</b> | -1385.857663    | -1385.847432     | -1385.846487       | -1385.895435          |
| <b>13A</b>  | -465.232320     | -465.223674      | -465.222729        | -465.265615           |
| <b>13B</b>  | -925.652682     | -925.641751      | -925.640807        | -925.690912           |
| <b>13C</b>  | -1385.908480    | -1385.896923     | -1385.895979       | -1385.949024          |
| <b>14A</b>  | -464.056270     | -464.049051      | -464.048107        | -464.087045           |
| <b>14B</b>  | -924.486403     | -924.478327      | -924.477382        | -924.520481           |
| <b>14C</b>  | -1384.741919    | -1384.732938     | -1384.731994       | -1384.778682          |
| <b>15A</b>  | -275.464411     | -275.461253      | -275.460308        | -275.486790           |
| <b>15B</b>  | -735.933112     | -735.928119      | -735.927175        | -735.959564           |
| <b>15C</b>  | -1196.176982    | -1196.170727     | -1196.169783       | -1196.208304          |

Table S18. Absolute energies of the structures in Table S3, where the choice of computational method is evaluated. Energies in Hartree at 298 K unless otherwise is noted.

|                               | <b>Sum(E + ZPE)</b> | <b>Sum(E + therm. energies)</b> | <b>Sum(E + therm. enthalpies)</b> | <b>Sum(E + therm. free energies)</b> |
|-------------------------------|---------------------|---------------------------------|-----------------------------------|--------------------------------------|
| <b>CH2O_CCSD(T)_augccpVTZ</b> | -114.31629          | -114.31343                      | -114.31248                        | -114.31813                           |
| <b>CH2O_B3LYP_ccpVDZ</b>      | -114.481281         | -114.478412                     | -114.477468                       | -114.502953                          |
| <b>CH2O_B3LYP_ccpVTZ</b>      | -114.522890         | -114.520023                     | -114.519079                       | -114.544541                          |
| <b>CH2O_B3LYP_ccpVQZ</b>      | -114.533153         | -114.530286                     | -114.529341                       | -114.554802                          |
| <b>CH2O_B3LYP_augccpVDZ</b>   | -114.494118         | -114.491248                     | -114.490304                       | -114.515790                          |
| <b>CH2O_B3LYP_augccpVTZ</b>   | -114.525656         | -114.522788                     | -114.521844                       | -114.547309                          |
| <b>CH2O_B3LYP_augccpVQZ</b>   | -114.534080         | -114.531213                     | -114.530268                       | -114.555731                          |
| <b>CH2O_MP2</b>               | -114.289578         | -114.286710                     | -114.285766                       | -114.311243                          |

|                        |             |             |             |             |
|------------------------|-------------|-------------|-------------|-------------|
| CH2O_M11               | -114.476066 | -114.473199 | -114.472255 | -114.497719 |
| 4A_CCSD(T)_augccpVTZ   | -314.32127  | -314.31676  | -314.31581  | -314.33187  |
| 4A_B3LYP_augccpVDZ     | -314.927519 | -314.923082 | -314.922138 | -314.954043 |
| 4A_B3LYP_augccpVQZ     | -314.980677 | -314.976200 | -314.975256 | -315.007291 |
| 4A_B3LYP_augccpVTZ     | -314.969579 | -314.965112 | -314.964168 | -314.996155 |
| 4A_B3LYP_ccpVDZ        | -314.915619 | -314.911195 | -314.910250 | -314.942065 |
| 4A_B3LYP_ccpVQZ        | -314.979498 | -314.975026 | -314.974082 | -315.006102 |
| 4A_B3LYP_ccpVTZ        | -314.967159 | -314.962706 | -314.961762 | -314.993711 |
| 4A_M11                 | -314.908504 | -314.904145 | -314.903201 | -314.934579 |
| 4A_MP2                 | -314.291518 | -314.287021 | -314.286077 | -314.318045 |
| 4A_wb97xd              | -314.910293 | -314.905844 | -314.904900 | -314.936666 |
| TS2A_CCSD(T)_augccpVTZ | -314,28327  | -314,27953  | -314,27859  | -314,28883  |
| TS2A_B3LYP_augccpVDZ   | -314,28327  | -314,27953  | -314,27859  | -314,28883  |
| TS2A_B3LYP_augccpVQZ   | -314.947115 | -314.943384 | -314.942440 | -314.972512 |
| TS2A_B3LYP_augccpVTZ   | -314.936280 | -314.932544 | -314.931600 | -314.961686 |
| TS2A_B3LYP_ccpVDZ      | -314.882618 | -314.878852 | -314.877908 | -314.908073 |
| TS2A_B3LYP_ccpVQZ      | -314.946255 | -314.942527 | -314.941583 | -314.971651 |
| TS2A_B3LYP_ccpVTZ      | -314.934246 | -314.930514 | -314.929570 | -314.959651 |
| TS2A_M11               | -314.874483 | -314.870752 | -314.869808 | -314.899885 |
| TS2A_MP2               | -314.247493 | -314.243746 | -314.242801 | -314.272922 |
| TS2A_wb97xd            | -314.874120 | -314.870394 | -314.869450 | -314.899513 |
| 5A_CCSD(T)_augccpVTZ   | -314,33201  | -314,32768  | -314,32673  | -314,33488  |
| 5A_B3LYP_augccpVDZ     | -314.945878 | -314.940226 | -314.939282 | -314.973143 |
| 5A_B3LYP_augccpVQZ     | -314.997834 | -314.992171 | -314.991227 | -315.025075 |
| 5A_B3LYP_augccpVTZ     | -314.986979 | -314.981298 | -314.980354 | -315.014221 |
| 5A_B3LYP_ccpVDZ        | -314.938379 | -314.932714 | -314.931769 | -314.965741 |
| 5A_B3LYP_ccpVQZ        | -314.996875 | -314.991197 | -314.990253 | -315.024111 |
| 5A_B3LYP_ccpVTZ        | -314.985390 | -314.979711 | -314.978767 | -315.012658 |
| 5A_M11                 | -314.917879 | -314.912277 | -314.911333 | -314.944890 |
| 5A_MP2                 | -314.294553 | -314.288844 | -314.287900 | -314.321929 |
| 5A_wb97xd              | -314.918624 | -314.912929 | -314.911985 | -314.945895 |
| 6A_CCSD(T)_ccpVTZ      | -199,94198  | -199,93961  | -199,93867  | -314,34395  |
| 6A_B3LYP_augccpVDZ     | -200.378602 | -200.376239 | -200.375295 | -200.396448 |
| 6A_B3LYP_augccpVQZ     | -200.389936 | -200.387573 | -200.386629 | -200.407770 |
| 6A_B3LYP_augccpVTZ     | -200.388116 | -200.385753 | -200.384809 | -200.405953 |
| 6A_B3LYP_ccpVDZ        | -200.378316 | -200.375953 | -200.375009 | -200.396164 |
| 6A_B3LYP_ccpVQZ        | -200.389773 | -200.387411 | -200.386467 | -200.407609 |
| 6A_B3LYP_ccpVTZ        | -200.387773 | -200.385411 | -200.384466 | -200.405613 |
| 6A_M11                 | -200.361876 | -200.359514 | -200.358569 | -200.379709 |
| 6A_MP2                 | -199.931982 | -199.929619 | -199.928675 | -199.949819 |

6A\_wb97xd

| -200.361665

| -200.359303

| -200.358359

| -200.379495

Table S19. Absolute energies of the structures in Table S6, regarding the binding energy of formate to neutrally charged earth alkali dichloride species. B3LYP/LANL2DZ energies in Hartree at 298 K.

|              | Sum(E + ZPE) | Sum(E + therm. energies) | Sum(E + therm. enthalpies) | Sum(E + therm. free energies) |
|--------------|--------------|--------------------------|----------------------------|-------------------------------|
| <b>BeCl2</b> | -44.7791860  | -44.7755220              | -44.7745780                | -44.8036880                   |
| <b>MgCl2</b> | -30.8732820  | -30.8688560              | -30.8679120                | -30.8991190                   |
| <b>CaCl2</b> | -66.5955470  | -66.5907360              | -66.5897910                | -66.6229720                   |
| <b>SrCl2</b> | -60.4717760  | -60.4667460              | -60.4658020                | -60.5006490                   |
| <b>BaCl2</b> | -55.2593140  | -55.2541610              | -55.2532160                | -55.2892290                   |
| <b>HCO2-</b> | -189.150175  | -189.147173              | -189.146229                | -189.174061                   |



## XYZ geometries

### Structures in Figure 1:

H-  
H -0.026580 -0.320250 0.000000

Mg2+  
Mg -0.067930 0.417290 0.000000

MgCl+  
Mg -0.339354 0.417290 0.000000  
Cl 1.782494 0.417290 0.000000

MgCl2  
Mg -0.067930 0.417290 -0.000000  
Cl 2.108265 0.417290 0.000000  
Cl -2.244125 0.417290 0.000000

HCO2-  
C -0.298966 0.809482 -0.027293  
H 0.382757 0.173258 0.653761  
O -0.625498 1.913462 0.455366  
O -0.582153 0.274528 -1.119074

CH3O-  
C -1.118216 -0.280734 0.047104  
H 0.030400 -0.390362 -0.084977  
H -1.421273 -1.400811 0.095775  
H -1.422743 -0.038994 -1.047241  
O -1.551048 0.509650 0.989339

### Structures in Figure 4:

CO2  
C -0.576664 -2.234195 -0.260501  
O 0.586215 -2.234195 -0.260501  
O -1.739543 -2.234195 -0.260501

1A  
Mg -0.679146 -0.544815 -0.125424  
C -0.850943 1.669811 0.074143  
O 0.296363 1.127856 -0.058362  
O -1.899889 0.943886 0.092426  
H -0.935316 2.757356 0.172118

1B  
Mg -4.578002 1.801678 0.327872  
C -4.267907 3.484380 1.865250  
O -3.813148 3.621068 0.690503  
O -4.890858 2.434956 2.206101  
H -4.119872 4.287786 2.599271  
Cl -4.872515 0.202194 -1.133679

1C

Mg -4.081510 1.038862 -4.695733  
C -3.596739 3.087898 -3.597222  
O -3.342659 2.991134 -4.827347  
O -4.096073 2.148323 -2.922704  
H -3.370683 4.043080 -3.085132  
Cl -6.150942 0.747009 -5.643579  
Cl -2.466430 -0.589276 -4.777060

2A  
Mg -3.187797 3.790073 -0.679357  
C -4.721735 1.288951 0.564698  
O -4.151108 2.219965 0.102027  
O -5.269817 0.394746 1.009101  
H -2.390570 5.088237 -1.325652

2B  
Mg -2.689158 3.594592 -1.274456  
C -4.326321 1.507870 0.347052  
O -3.983101 2.628056 0.247971  
O -4.684684 0.423329 0.480507  
H -2.530326 5.239409 -0.923350  
Cl -2.388763 1.679530 -2.382074

2C  
Mg -2.287723 3.806009 -1.555677  
C -4.073151 1.875408 0.141434  
O -3.399755 1.573181 -0.764536  
O -4.771304 2.065832 1.048949  
H -3.282851 4.331131 -0.195343  
Cl -3.111235 3.939332 -3.706978  
Cl -0.060744 3.298724 -1.228269

3A  
H 1.381369 0.117148 0.000000  
Mg -0.278277 0.158638 0.000000

3B  
H 1.346269 0.118020 0.000000  
Mg -0.334860 0.160061 0.000000  
Cl -2.529967 0.214927 0.000000

3C  
Mg -0.276920 0.158578 -0.009459  
Cl -2.325741 0.209826 -1.071326  
H -0.157554 0.155646 1.733321  
Cl 1.608037 0.111481 -1.340922

TS1primeA  
Mg -2.731705 1.850077 -1.462211  
C -4.202709 2.195083 0.391647  
O -3.916701 1.101247 -0.275290  
O -4.926401 2.376133 1.306945  
H -3.610693 3.140710 -0.030581

TS1A  
Mg -2.787853 3.257283 -1.050152  
C -4.234087 2.236535 0.448095  
O -3.603883 1.647830 -0.472718  
O -4.982967 2.111840 1.328799  
H -3.846214 3.656127 0.342986

TS1B  
Mg -2.749886 2.903994 -1.422254  
C -4.240046 1.988287 0.386387  
O -3.736301 1.347991 -0.510346  
O -4.875398 2.187427 1.334548  
H -3.559078 3.671528 -0.059854  
Cl -1.475645 2.914557 -3.203830

TS1C  
Mg -2.334962 3.669393 -1.533576  
C -4.001487 2.015789 0.090471  
O -3.347545 1.633433 -0.812858  
O -4.714465 2.140468 0.999939  
H -3.358287 4.148425 -0.150537  
Cl -3.151585 3.941250 -3.670174  
Cl -0.088932 3.298859 -1.181584

TS1primeA  
Mg -2.731705 1.850077 -1.462211  
C -4.202709 2.195083 0.391647  
O -3.916701 1.101247 -0.275290  
O -4.926401 2.376133 1.306945  
H -3.610693 3.140710 -0.030581

#### Structures in Figure 6:

CH2O  
C 0.469637 0.531595 0.753747  
H 0.948798 1.054063 1.608997  
H -0.640788 0.562042 0.746580  
O 1.104539 -0.024512 -0.099222

4A  
C -4.210402 -1.714394 -0.943236  
H -3.701844 -2.639139 -0.644858  
H -3.824527 -1.401613 -1.918025  
H -5.282877 -1.915191 -1.023516  
O -3.941155 -0.743251 0.052945  
Mg -4.116137 0.861885 0.695359

4B  
C 0.016949 -0.125454 0.469948  
H 0.386806 -1.158042 0.379917  
H 0.289526 0.234116 1.473715  
H -1.081845 -0.165488 0.423177  
O 0.539452 0.690902 -0.522645  
Mg 1.199443 1.722638 -1.776860  
Cl 2.022196 3.008237 -3.340212

4C

Mg -1.976616 0.534139 -2.018654  
Cl -0.625410 -1.240663 -2.540136  
Cl -1.814090 2.454406 -3.269807  
O -3.157805 0.403018 -0.626245  
C -4.135557 0.955971 0.156934  
H -5.083574 0.378853 0.125272  
H -3.849081 0.998910 1.228798  
H -4.401785 1.994270 -0.128651

5A  
C -3.898946 -1.919708 -0.867107  
H -4.334633 -2.881422 -0.563701  
H -3.214240 -1.889018 -1.725601  
H -4.977862 2.125731 1.541450  
O -4.172706 -0.896092 -0.256725  
Mg -4.607916 0.737570 0.715489

5B  
C -3.783556 -1.718311 -0.620815  
H -3.821700 -2.778169 -0.917725  
H -2.895773 -1.117562 -0.870871  
H -6.353016 1.096288 1.456436  
O -4.720540 -1.225158 -0.021517  
Mg -4.892395 0.772968 0.656196  
Cl -2.895297 1.499414 -0.090136

5C  
C -3.957472 -1.603475 -0.709242  
H -3.860554 -2.628259 -1.118011  
H -3.379882 -0.799780 -1.186664  
H -5.784578 0.924620 2.253933  
O -4.681453 -1.392972 0.236918  
Mg -4.723826 0.762618 0.866560  
Cl -2.368536 0.794229 1.076364  
Cl -5.379632 1.427880 -1.304527

6A  
H 1.381369 0.117148 0.000000  
Mg -0.278277 0.158638 0.000000

6B  
H 1.346269 0.118020 0.000000  
Mg -0.334860 0.160061 0.000000  
Cl -2.529967 0.214927 0.000000

6C  
Mg -0.276920 0.158578 -0.009459  
Cl -2.325741 0.209826 -1.071326  
H -0.157554 0.155646 1.733321  
Cl 1.608037 0.111481 -1.340922

TS2A  
C -4.191257 -1.470804 -0.804469  
H -5.059971 -2.137006 -0.757024  
H -3.571649 -1.560148 -1.703825  
H -5.123845 -0.143299 -1.461640

O -3.695601 -0.973881 0.277449  
Mg -4.523379 0.668289 -0.022953

TS2B

C -4.104839 -1.689522 -0.724750  
H -4.930040 -2.417662 -0.678221  
H -3.532971 -1.654654 -1.663259  
H -5.287698 0.219293 -1.667048  
O -3.786525 -1.024175 0.257118  
Mg -4.590915 0.839878 -0.195692  
Cl -4.277997 2.506088 1.215961

TS2C

C -3.911743 -1.658608 -0.640682  
H -4.135760 -2.712298 -0.899134  
H -3.411187 -1.055170 -1.410917  
H -5.594533 -0.016655 -1.676068  
O -4.155307 -1.225471 0.470524  
Mg -4.923414 0.818149 -0.226198  
Cl -2.842170 1.795135 -0.627995  
Cl -6.307086 1.556928 1.465888

**Structures in Table 1 (B3LYP/LANL2DZ):**

CH2O

C 0.461100 0.539070 0.765214  
H 0.948078 1.056638 1.613057  
H -0.644788 0.563602 0.748862  
O 1.117795 -0.036122 -0.117031

CO2

C -0.576664 -2.234195 -0.260501  
O 0.616604 -2.234195 -0.260501  
O -1.769932 -2.234195 -0.260501

HCO2MgBr2

Mg -4.082227 1.036145 -4.697162  
C -3.579405 3.161058 -3.557998  
O -3.330039 3.026613 -4.826551  
O -4.094974 2.170751 -2.892444  
H -3.355386 4.107536 -3.050567  
Br -6.357113 0.717074 -5.738467  
Br -2.305894 -0.752148 -4.785589

HCO2MgBr

Mg -4.579436 1.793403 0.320275  
C -4.255880 3.549729 1.924944  
O -3.801107 3.655632 0.704988  
O -4.893010 2.453900 2.240455  
H -4.108857 4.347853 2.654150  
Br -4.904011 0.031546 -1.289493

HCO2MgCl2

Mg -4.088088 1.011480 -4.710389  
C -3.584575 3.139176 -3.569726  
O -3.334363 3.007235 -4.837989  
O -4.100016 2.150638 -2.902180

H -3.360401 4.086182 -3.062003  
Cl -6.193313 0.715922 -5.674152  
Cl -2.444282 -0.643604 -4.792339

HCO2MgCl

Mg -4.582832 1.775046 0.303505  
C -4.259736 3.528785 1.905808  
O -3.805003 3.634555 0.685761  
O -4.896880 2.432857 2.221201  
H -4.112712 4.326871 2.634977  
Cl -4.885139 0.133948 -1.195933

HCO2MgF2

Mg -4.107719 0.931882 -4.753369  
C -3.598534 3.076297 -3.603084  
O -3.345694 2.953438 -4.870208  
O -4.113779 2.094296 -2.928672  
H -3.373099 4.025468 -3.093877  
F -5.751917 0.726469 -5.494804  
F -2.814295 -0.340823 -4.804763

HCO2MgF

Mg -4.593702 1.716213 0.249848  
C -4.270480 3.470445 1.852494  
O -3.815307 3.577441 0.632908  
O -4.907744 2.375170 2.169198  
H -4.123408 4.268672 2.581753  
F -4.831661 0.424121 -0.930884

HCO2MgI2

Mg -4.075227 1.065679 -4.681340  
C -3.573297 3.186950 -3.544122  
O -3.324753 3.050330 -4.813028  
O -4.088930 2.195002 -2.880258  
H -3.349417 4.132903 -3.036979  
I -6.543251 0.714689 -5.813244  
I -2.150161 -0.878525 -4.779806

HCO2MgI

Mg -4.575403 1.815318 0.340305  
C -4.251470 3.573679 1.946828  
O -3.796701 3.679698 0.727043  
O -4.888549 2.478029 2.262438  
H -4.104429 4.371874 2.676099  
I -4.925750 -0.086536 -1.397395

HMgBr2

H 0.615160 1.142620 1.172854  
Mg 0.615160 -0.092803 -0.062569  
Br 2.783358 -1.033013 -1.002779  
Br -1.553038 -1.033013 -1.002779

HMgBr

H 1.425853 0.116035 0.000000  
Mg -0.261155 0.158210 0.000000  
Br -2.683256 0.218763 0.000000

HMgCl<sub>2</sub>

|    |           |           |           |
|----|-----------|-----------|-----------|
| H  | 0.615160  | 1.220063  | 1.250298  |
| Cl | -1.391803 | -0.888031 | -0.857796 |
| Cl | 2.622123  | -0.888031 | -0.857796 |
| Mg | 0.615160  | -0.021805 | 0.008429  |

## HMgCl

|    |           |          |          |
|----|-----------|----------|----------|
| H  | 1.369342  | 0.117448 | 0.000000 |
| Mg | -0.317588 | 0.159621 | 0.000000 |
| Cl | -2.570312 | 0.215939 | 0.000000 |

HMgF<sub>2</sub>

|    |           |           |           |
|----|-----------|-----------|-----------|
| H  | 0.615160  | 1.123492  | 1.153726  |
| Mg | 0.615160  | -0.140383 | -0.110149 |
| F  | 2.180457  | -0.801669 | -0.771435 |
| F  | -0.950138 | -0.801669 | -0.771435 |

## HMgF

|    |           |          |          |
|----|-----------|----------|----------|
| H  | 1.213777  | 0.121338 | 0.000000 |
| Mg | -0.481432 | 0.163713 | 0.000000 |
| F  | -2.250904 | 0.207957 | 0.000000 |

HMgI<sub>2</sub>

|    |           |           |           |
|----|-----------|-----------|-----------|
| H  | 0.615160  | 1.145832  | 1.176066  |
| Mg | 0.615160  | -0.084727 | -0.054493 |
| I  | 2.972321  | -1.105832 | -1.075598 |
| I  | -1.742001 | -1.105832 | -1.075598 |

## HMgI

|    |           |          |          |
|----|-----------|----------|----------|
| H  | 1.490545  | 0.114410 | 0.000000 |
| Mg | -0.195678 | 0.156587 | 0.000000 |
| I  | -2.813425 | 0.222011 | 0.000000 |

MeOMgBr<sub>2</sub>

|    |           |           |           |
|----|-----------|-----------|-----------|
| Mg | -1.997419 | 0.657175  | -2.064722 |
| Br | -0.652176 | -1.462551 | -2.402403 |
| Br | -1.510640 | 2.567483  | -3.656921 |
| O  | -3.228601 | 0.799019  | -0.768446 |
| C  | -4.196453 | 0.947251  | 0.230083  |
| H  | -5.003287 | 0.189880  | 0.146252  |
| H  | -3.767328 | 0.838882  | 1.247791  |
| H  | -4.688015 | 1.941764  | 0.195877  |

## MeOMgBr

|    |           |           |           |
|----|-----------|-----------|-----------|
| C  | -0.000696 | -0.153014 | 0.503472  |
| H  | 0.374955  | -1.184207 | 0.405434  |
| H  | 0.277197  | 0.214589  | 1.504336  |
| H  | -1.100673 | -0.187000 | 0.448881  |
| O  | 0.532635  | 0.680338  | -0.509862 |
| Mg | 1.190532  | 1.708578  | -1.759946 |
| Br | 2.098576  | 3.127625  | -3.485275 |

MeOMgCl<sub>2</sub>

|    |           |           |           |
|----|-----------|-----------|-----------|
| Mg | -1.974816 | 0.648260  | -2.083451 |
| Cl | -0.751333 | -1.326502 | -2.391395 |

|    |           |          |           |
|----|-----------|----------|-----------|
| Cl | -1.505258 | 2.415512 | -3.549766 |
| O  | -3.212501 | 0.800312 | -0.786693 |
| C  | -4.180874 | 0.951971 | 0.208711  |
| H  | -4.980644 | 0.184489 | 0.138778  |
| H  | -3.752472 | 0.864807 | 1.229707  |
| H  | -4.686020 | 1.940055 | 0.161619  |

## MeOMgCl

|    |           |           |           |
|----|-----------|-----------|-----------|
| C  | 0.008487  | -0.138664 | 0.486024  |
| H  | 0.384007  | -1.169974 | 0.388192  |
| H  | 0.286254  | 0.228757  | 1.487042  |
| H  | -1.091542 | -0.172807 | 0.431629  |
| O  | 0.541637  | 0.694383  | -0.526937 |
| Mg | 1.198745  | 1.721395  | -1.775522 |
| Cl | 2.044938  | 3.043819  | -3.383389 |

MeOMgF<sub>2</sub>

|    |           |           |           |
|----|-----------|-----------|-----------|
| Mg | -1.908810 | 0.603182  | -2.134349 |
| F  | -0.971269 | -0.944158 | -2.350807 |
| F  | -1.549704 | 1.981035  | -3.271952 |
| O  | -3.163381 | 0.766994  | -0.824086 |
| C  | -4.136525 | 0.971777  | 0.149878  |
| H  | -4.968884 | 0.234069  | 0.088421  |
| H  | -3.733487 | 0.888604  | 1.184992  |
| H  | -4.611856 | 1.977400  | 0.085414  |

## MeOMgF

|    |           |           |           |
|----|-----------|-----------|-----------|
| C  | 0.034595  | -0.097861 | 0.436414  |
| H  | 0.409214  | -1.130137 | 0.340144  |
| H  | 0.311533  | 0.268314  | 1.438625  |
| H  | -1.065932 | -0.133173 | 0.383510  |
| O  | 0.567275  | 0.734336  | -0.575667 |
| Mg | 1.224533  | 1.761598  | -1.824539 |
| F  | 1.891308  | 2.803832  | -3.091446 |

MeOMgI<sub>2</sub>

|    |           |           |           |
|----|-----------|-----------|-----------|
| Mg | -2.021257 | 0.669893  | -2.045086 |
| I  | -0.541361 | -1.618149 | -2.420814 |
| I  | -1.515589 | 2.751507  | -3.772667 |
| O  | -3.246761 | 0.799470  | -0.748180 |
| C  | -4.214349 | 0.939039  | 0.254715  |
| H  | -5.024410 | 0.188114  | 0.157557  |
| H  | -3.783129 | 0.811877  | 1.268324  |
| H  | -4.697062 | 1.937153  | 0.233663  |

## MeOMgI

|    |           |           |           |
|----|-----------|-----------|-----------|
| C  | -0.011177 | -0.169399 | 0.523391  |
| H  | 0.364552  | -1.200545 | 0.425213  |
| H  | 0.266769  | 0.198287  | 1.524205  |
| H  | -1.111146 | -0.203297 | 0.468670  |
| O  | 0.522264  | 0.664132  | -0.490094 |
| Mg | 1.180849  | 1.693447  | -1.741480 |
| I  | 2.160415  | 3.224285  | -3.602865 |

TS\_HCO<sub>2</sub>MgBr<sub>2</sub>

|    |           |          |           |
|----|-----------|----------|-----------|
| Mg | -2.221061 | 3.847593 | -1.637985 |
|----|-----------|----------|-----------|

C -4.190165 1.821506 0.296259  
O -3.620925 1.277841 -0.607374  
O -4.821495 2.209964 1.233021  
H -3.268809 3.996736 -0.234538  
Br -3.138153 4.247163 -3.966081  
Br 0.263343 3.446816 -1.341618

TS\_HCO2MgBr  
Mg -2.742572 2.928484 -1.416980  
C -4.299398 1.948858 0.445322  
O -3.772988 1.355968 -0.505458  
O -4.942484 2.143984 1.422941  
H -3.528963 3.714240 -0.031160  
Br -1.349949 2.922251 -3.390014

TS\_HCO2MgCl2  
Mg -2.077653 3.879657 -1.785090  
C -4.322116 1.774033 0.402984  
O -3.863542 0.930339 -0.314317  
O -4.894476 2.441767 1.216534  
H -3.232852 3.540589 -0.500904  
Cl -2.826529 4.416235 -3.936182  
Cl 0.219905 3.864999 -1.341344

TS\_HCO2MgCl  
Mg -2.729336 2.927369 -1.439456  
C -4.278102 1.955973 0.423242  
O -3.738333 1.355630 -0.516049  
O -4.930371 2.152086 1.394674  
H -3.535313 3.720354 -0.068739  
Cl -1.424899 2.902373 -3.269022

TS\_HCO2MgF2  
Mg -1.895445 3.732068 -1.498541  
C -4.357222 2.054412 -0.100147  
O -3.779359 1.004638 -0.028445  
O -5.164805 2.941372 -0.147269  
H -2.521831 3.382229 0.143221  
F -2.847899 2.966929 -2.842918  
F -0.430702 4.765971 -1.784218

TS\_HCO2MgF  
Mg -2.678858 2.923178 -1.508583  
C -4.233600 1.965183 0.363849  
O -3.685666 1.356201 -0.563504  
O -4.891178 2.174426 1.329319  
H -3.496499 3.737079 -0.151306  
F -1.650553 2.857716 -2.945125

TS\_HCO2MgI2  
Mg -2.233114 3.875843 -1.600585  
C -4.238890 1.781081 0.308860  
O -3.602050 1.282934 -0.573494  
O -4.917384 2.162574 1.213473  
H -3.323475 4.069747 -0.245351  
I -3.143489 4.193878 -4.181629

I 0.461139 3.481560 -1.179592

TS\_HCO2MgI  
Mg -2.766552 2.935520 -1.395234  
C -4.311565 1.938265 0.477824  
O -3.774538 1.350091 -0.468897  
O -4.957046 2.133237 1.453785  
H -3.564858 3.719377 -0.016464  
I -1.261794 2.937294 -3.526364

TS\_MeOMgBr2  
C -3.919643 -1.696798 -0.686443  
H -4.190549 -2.748731 -0.871988  
H -3.404067 -1.157279 -1.490358  
H -5.543838 -0.062166 -1.674486  
O -4.124634 -1.176791 0.444708  
Mg -4.913750 0.788160 -0.193230  
Br -2.665558 1.950980 -0.672726  
Br -6.519160 1.604635 1.599941

TS\_MeOMgBr  
C -4.101648 -1.725849 -0.786242  
H -5.003103 -2.350636 -0.728177  
H -3.482220 -1.820578 -1.688291  
H -5.290536 0.155541 -1.629177  
O -3.723037 -1.022418 0.201818  
Mg -4.582989 0.810297 -0.146747  
Br -4.327453 2.732890 1.320925

TS\_MeOMgCl2  
C -3.901863 -1.663994 -0.677217  
H -4.119967 -2.719234 -0.909966  
H -3.393764 -1.068141 -1.445438  
H -5.593722 -0.049897 -1.657094  
O -4.160486 -1.197609 0.464847  
Mg -4.933801 0.802177 -0.181021  
Cl -2.811188 1.776655 -0.629950  
Cl -6.366407 1.622052 1.491259

TS\_MeOMgCl  
C -4.101921 -1.702966 -0.775029  
H -5.003786 -2.327285 -0.718384  
H -3.482819 -1.796312 -1.677441  
H -5.287353 0.175666 -1.614076  
O -3.721443 -1.003965 0.215352  
Mg -4.579105 0.827155 -0.130091  
Cl -4.334560 2.606955 1.243779

TS\_MeOMgF2  
C -6.745820 -2.217614 -0.168275  
O -7.554395 -1.325808 0.235456  
Mg -4.830038 -0.156460 -0.589800  
F -4.329036 1.335153 0.311175  
F -5.136163 -0.218765 -2.379318  
H -6.435775 -2.277445 -1.224438  
H -6.501127 -3.096459 0.451894

H -4.769437 -1.787502 0.200455

TS\_MeOMgF

C -4.097062 -1.653439 -0.742495  
H -5.001604 -2.274751 -0.689911  
H -3.479621 -1.743148 -1.646776  
H -5.287408 0.256273 -1.570860  
O -3.716196 -0.959613 0.248681  
Mg -4.569172 0.888342 -0.077197  
F -4.359922 2.265584 1.022669

TS\_MeOMgI2

C -3.938684 -1.731425 -0.692811  
H -4.260461 -2.775534 -0.832949  
H -3.415314 -1.247806 -1.526620  
H -5.500845 -0.075313 -1.699123  
O -4.094215 -1.161902 0.423713  
Mg -4.892569 0.771526 -0.214641  
I -2.497805 2.134110 -0.726201  
I -6.681306 1.588353 1.724052

TS\_MeOMgI

C -4.100699 -1.750758 -0.797780  
H -5.000494 -2.377685 -0.737075  
H -3.480326 -1.847850 -1.698929  
H -5.297509 0.131624 -1.650841  
O -3.726448 -1.038937 0.185782  
Mg -4.591886 0.792194 -0.171623  
I -4.313624 2.870659 1.414576

**Structures in Table 2 (B3LYP/LANL2DZ):**

HBaCl2

H 0.267963 1.682375 1.782663  
Cl -1.801812 -1.294383 -1.401112  
Cl 3.396520 -0.911399 -0.818931  
Ba 0.597968 -0.054396 -0.019485

HBaCl

H 1.931483 -0.258814 0.000000  
Ba -0.296256 0.787603 0.000000  
Cl -3.153785 -0.035782 0.000000

HBa

H 0.615160 1.239631 1.269865  
Ba 0.615160 -0.443124 -0.412889

HBeCl2

Be 0.615160 -0.021046 0.009188  
H 0.615160 0.950042 0.980276  
Cl -1.100942 -0.753399 -0.723165  
Cl 2.331261 -0.753399 -0.723165

HBeCl

H 0.985145 0.127054 0.000000  
Be -0.330256 0.159936 0.000000  
Cl -2.173446 0.206018 0.000000

HBe

Be 0.615160 -0.074460 -0.044226  
H 0.615160 0.870968 0.901202

HCaCl2

H 0.615160 1.484263 1.514497  
Cl -1.704394 -1.014186 -0.983952  
Cl 2.934714 -1.014186 -0.983952  
Ca 0.615160 -0.033693 -0.003459

HCaCl

H 1.778452 0.107308 0.000000  
Ca -0.325210 0.159656 0.000000  
Cl -2.971800 0.226044 0.000000

HCa

H 0.615160 1.124405 1.154639  
Ca 0.615160 -0.327897 -0.297663

HCO2BaCl2

Ba -4.181166 0.774283 -4.855884  
C -3.461606 3.448584 -3.380445  
O -3.212510 3.367998 -4.651872  
O -3.990153 2.490455 -2.682109  
H -3.208430 4.389580 -2.861304  
Cl -6.922109 0.437829 -6.090864  
Cl -2.129062 -1.441701 -5.026298

HCO2BaCl

Ba -4.579240 1.489898 0.085349  
C -4.266925 3.802715 2.109371  
O -3.733020 3.929462 0.929351  
O -4.927353 2.741342 2.471094  
H -4.155618 4.624587 2.828946  
Cl -4.880147 -0.755942 -1.868794

HCO2Ba

Ba -0.630726 -1.168897 -0.181472  
C -0.863201 1.827654 0.088316  
O 0.315181 1.285261 -0.046687  
O -1.942756 1.096079 0.108332  
H -0.947429 2.913997 0.186412

HCO2BeCl2

Be -4.021347 0.969643 -5.055489  
C -3.670970 3.063934 -3.319616  
O -3.681926 2.321022 -4.409842  
O -4.060404 2.737407 -2.174802  
H -3.259523 4.073102 -3.512410  
Cl -5.782897 0.723560 -5.907781  
Cl -2.627972 -0.421639 -5.168837

HCO2BeCl

Be -4.555931 1.909198 0.419495  
C -4.284550 3.406494 1.800982

|    |           |          |           |
|----|-----------|----------|-----------|
| O  | -3.847700 | 3.465701 | 0.566611  |
| O  | -4.913879 | 2.285244 | 2.055428  |
| H  | -4.140889 | 4.199195 | 2.532396  |
| Cl | -4.799353 | 0.566229 | -0.819594 |

#### HCO2Be

|    |           |           |           |
|----|-----------|-----------|-----------|
| Be | -0.694109 | -0.288116 | -0.102653 |
| C  | -0.852324 | 1.667049  | 0.074012  |
| O  | 0.297447  | 1.008072  | -0.068546 |
| O  | -1.880097 | 0.818412  | 0.080345  |
| H  | -0.939849 | 2.748677  | 0.171742  |

#### HCO2CaCl2

|    |           |           |           |
|----|-----------|-----------|-----------|
| Ca | -4.115731 | 0.893262  | -4.773732 |
| C  | -3.545061 | 3.306703  | -3.479957 |
| O  | -3.284256 | 3.201427  | -4.748174 |
| O  | -4.060453 | 2.334774  | -2.789151 |
| H  | -3.320691 | 4.256038  | -2.971117 |
| Cl | -6.528296 | 0.513326  | -5.895904 |
| Cl | -2.250548 | -1.038502 | -4.890742 |

#### HCO2CaCl

|    |           |           |           |
|----|-----------|-----------|-----------|
| Ca | -4.606142 | 1.644570  | 0.184898  |
| C  | -4.236862 | 3.653508  | 2.019705  |
| O  | -3.768933 | 3.793220  | 0.811272  |
| O  | -4.877569 | 2.573773  | 2.369654  |
| H  | -4.089740 | 4.453846  | 2.750584  |
| Cl | -4.963056 | -0.286856 | -1.580794 |

#### HCO2Ca

|    |           |           |           |
|----|-----------|-----------|-----------|
| Ca | -0.651030 | -0.907919 | -0.158108 |
| C  | -0.858816 | 1.771471  | 0.083294  |
| O  | 0.315015  | 1.212034  | -0.052709 |
| O  | -1.931215 | 1.023806  | 0.101504  |
| H  | -0.942885 | 2.854702  | 0.180920  |

#### HCO2Mg

|    |           |           |           |
|----|-----------|-----------|-----------|
| Mg | -0.673913 | -0.612174 | -0.131478 |
| C  | -0.854558 | 1.716369  | 0.078334  |
| O  | 0.308216  | 1.118927  | -0.060025 |
| O  | -1.910221 | 0.933106  | 0.092286  |
| H  | -0.938455 | 2.797867  | 0.175784  |

#### HCO2SrCl2

|    |           |           |           |
|----|-----------|-----------|-----------|
| Sr | -4.147317 | 0.840901  | -4.811003 |
| C  | -3.504235 | 3.371222  | -3.432985 |
| O  | -3.248808 | 3.278708  | -4.702841 |
| O  | -4.028102 | 2.406914  | -2.738703 |
| H  | -3.264303 | 4.315847  | -2.918514 |
| Cl | -6.708674 | 0.480103  | -5.987316 |
| Cl | -2.203598 | -1.226666 | -4.957415 |

#### HCO2SrCl

|    |           |          |          |
|----|-----------|----------|----------|
| Sr | -4.601464 | 1.573859 | 0.139097 |
| C  | -4.242410 | 3.720500 | 2.062010 |
| O  | -3.670928 | 3.814026 | 0.895508 |

|    |           |           |           |
|----|-----------|-----------|-----------|
| O  | -4.970308 | 2.691799  | 2.390681  |
| H  | -4.106936 | 4.530401  | 2.787635  |
| Cl | -4.950256 | -0.498524 | -1.719614 |

#### HCO2Sr

|    |           |           |           |
|----|-----------|-----------|-----------|
| Sr | -0.641600 | -1.028802 | -0.168975 |
| C  | -0.860789 | 1.796594  | 0.085552  |
| O  | 0.315556  | 1.246872  | -0.049901 |
| O  | -1.937201 | 1.058126  | 0.104763  |
| H  | -0.944897 | 2.881304  | 0.183462  |

#### HMg

|    |          |           |           |
|----|----------|-----------|-----------|
| H  | 0.615160 | 0.984543  | 1.014777  |
| Mg | 0.615160 | -0.188036 | -0.157802 |

#### HSrCl2

|    |           |           |           |
|----|-----------|-----------|-----------|
| H  | 0.462897  | 1.618198  | 1.595876  |
| Cl | -1.760553 | -1.218898 | -1.091981 |
| Cl | 3.151882  | -0.936495 | -0.947387 |
| Sr | 0.606414  | -0.040608 | -0.013374 |

#### HSrCl

|    |           |           |          |
|----|-----------|-----------|----------|
| H  | 1.811193  | 0.395430  | 0.000000 |
| Sr | -0.323500 | -0.346178 | 0.000000 |
| Cl | -3.006251 | 0.443756  | 0.000000 |

#### HSr

|    |          |           |           |
|----|----------|-----------|-----------|
| H  | 0.615160 | 1.175008  | 1.205242  |
| Sr | 0.615160 | -0.378501 | -0.348266 |

#### TS\_HCO2BaCl2

|    |           |          |           |
|----|-----------|----------|-----------|
| C  | -4.613115 | 1.821367 | -0.227185 |
| O  | -3.470418 | 1.533959 | -0.454937 |
| O  | -5.757393 | 2.014288 | 0.023853  |
| Ba | -1.808011 | 3.582870 | -1.624032 |
| Cl | -3.840193 | 2.727942 | -3.724094 |
| Cl | 1.215847  | 3.574265 | -1.941535 |
| H  | -3.133658 | 4.513690 | 0.333771  |

#### TS\_HCO2Ba

|    |           |          |           |
|----|-----------|----------|-----------|
| C  | -4.277065 | 2.107862 | 0.474414  |
| O  | -3.538024 | 1.781449 | -0.444304 |
| O  | -5.037389 | 2.180311 | 1.373864  |
| H  | -3.647357 | 4.312317 | 0.119926  |
| Ba | -2.170792 | 3.706100 | -1.709594 |

#### TS\_HCO2BeCl2

|    |           |          |           |
|----|-----------|----------|-----------|
| O  | -4.121066 | 0.740017 | -0.092323 |
| Be | -2.260829 | 3.475771 | -1.673512 |
| Cl | -0.356662 | 3.673852 | -1.192831 |
| Cl | -3.002287 | 4.227980 | -3.341003 |
| H  | -3.109475 | 2.782121 | -0.807255 |
| C  | -4.237615 | 1.863070 | 0.340306  |
| O  | -4.619706 | 2.769729 | 1.043136  |

#### TS\_HCO2BeCl

|    |           |          |           |
|----|-----------|----------|-----------|
| Be | -2.866667 | 2.808658 | -1.284040 |
| C  | -4.161528 | 2.023671 | 0.283162  |
| O  | -3.613724 | 1.399674 | -0.652270 |
| O  | -4.816904 | 2.226799 | 1.247392  |
| H  | -3.411157 | 3.652041 | -0.290586 |
| Cl | -1.766375 | 2.902943 | -2.779007 |

|           |           |          |           |
|-----------|-----------|----------|-----------|
| TS_HCO2Be |           |          |           |
| C         | -4.233530 | 2.373841 | 0.483025  |
| O         | -3.569706 | 1.678418 | -0.506335 |
| O         | -5.005131 | 2.083665 | 1.348404  |
| H         | -3.877275 | 3.553874 | 0.354480  |
| Be        | -2.917800 | 2.927051 | -0.977526 |

|              |           |          |           |
|--------------|-----------|----------|-----------|
| TS_HCO2CaCl2 |           |          |           |
| C            | -5.302717 | 4.115750 | -0.543412 |
| O            | -4.331484 | 3.427099 | -0.670656 |
| Ca           | -2.049352 | 4.494215 | -1.287205 |
| O            | -6.300247 | 4.744783 | -0.405641 |
| Cl           | -3.227929 | 4.645681 | -3.734165 |
| Cl           | 0.139659  | 2.974100 | -0.862129 |
| H            | -2.837794 | 5.906225 | 0.159564  |

|             |           |          |           |
|-------------|-----------|----------|-----------|
| TS_HCO2CaCl |           |          |           |
| Ca          | -2.538832 | 3.124333 | -1.553489 |
| C           | -4.475085 | 1.801789 | 0.550694  |
| O           | -3.929346 | 1.425938 | -0.470363 |
| O           | -5.091189 | 1.954994 | 1.548314  |
| H           | -3.436981 | 3.925454 | 0.232124  |
| Cl          | -1.164921 | 2.781277 | -3.782629 |

|           |           |          |           |
|-----------|-----------|----------|-----------|
| TS_HCO2Ca |           |          |           |
| C         | -4.280960 | 2.083376 | 0.477235  |
| O         | -3.558437 | 1.718883 | -0.471819 |
| O         | -5.047075 | 1.985505 | 1.374850  |
| H         | -3.834390 | 3.937105 | 0.358270  |
| Ca        | -2.516484 | 3.614033 | -1.295544 |

|           |           |          |           |
|-----------|-----------|----------|-----------|
| TS_HCO2Mg |           |          |           |
| Mg        | -2.747807 | 3.275288 | -1.094440 |
| C         | -4.261612 | 2.207438 | 0.474133  |
| O         | -3.594251 | 1.655009 | -0.482495 |
| O         | -5.027429 | 2.076976 | 1.373846  |
| H         | -3.823905 | 3.694903 | 0.325965  |

|              |           |          |           |
|--------------|-----------|----------|-----------|
| TS_HCO2SrCl2 |           |          |           |
| C            | -4.436188 | 1.859627 | 0.051696  |
| O            | -5.565010 | 1.932439 | 0.411944  |
| O            | -3.298424 | 1.710012 | -0.294471 |
| Sr           | -1.961462 | 3.812398 | -1.393490 |
| Cl           | -3.765215 | 3.065940 | -3.496452 |
| Cl           | 0.879691  | 3.779946 | -1.660228 |
| H            | -3.117243 | 4.672343 | 0.446447  |

|             |           |          |           |
|-------------|-----------|----------|-----------|
| TS_HCO2SrCl |           |          |           |
| Sr          | -2.820809 | 3.071819 | -1.646373 |

|    |           |          |           |
|----|-----------|----------|-----------|
| C  | -4.639597 | 1.816226 | 1.075175  |
| O  | -3.745157 | 1.564462 | 0.307136  |
| O  | -5.504359 | 1.997099 | 1.858734  |
| H  | -4.539024 | 4.203362 | -0.595258 |
| Cl | -0.704784 | 2.162352 | -3.259874 |

|           |           |          |           |
|-----------|-----------|----------|-----------|
| TS_HCO2Sr |           |          |           |
| C         | -4.330475 | 2.196216 | 0.561306  |
| O         | -3.598764 | 1.927230 | -0.398293 |
| O         | -5.091827 | 2.085292 | 1.459675  |
| H         | -3.867869 | 4.191585 | 0.509493  |
| Sr        | -2.465595 | 3.959439 | -1.255776 |

#### Structures in Table 4 (B3LYP/LANL2DZ):

|          |           |           |           |
|----------|-----------|-----------|-----------|
| MeOBaCl2 |           |           |           |
| Ba       | -1.791215 | 0.617369  | -2.345454 |
| Cl       | -0.228179 | -1.970231 | -2.672336 |
| Cl       | -1.281780 | 2.912067  | -4.274341 |
| O        | -3.417650 | 0.850166  | -0.572411 |
| C        | -4.360148 | 0.985726  | 0.456734  |
| H        | -5.344247 | 0.516961  | 0.215509  |
| H        | -4.032761 | 0.516944  | 1.415383  |
| H        | -4.587938 | 2.049902  | 0.704428  |

|         |           |           |           |
|---------|-----------|-----------|-----------|
| MeOBaCl |           |           |           |
| C       | -0.097339 | -0.291843 | 0.686894  |
| H       | 0.451767  | -1.251630 | 0.784855  |
| H       | -0.065635 | 0.189158  | 1.686886  |
| H       | -1.159230 | -0.557413 | 0.502020  |
| O       | 0.436511  | 0.534157  | -0.326331 |
| Ba      | 1.333567  | 1.922785  | -2.028652 |
| Cl      | 2.472882  | 3.661694  | -4.198632 |

|       |           |           |           |
|-------|-----------|-----------|-----------|
| MeOBa |           |           |           |
| C     | -4.222116 | -1.785366 | -1.013067 |
| H     | -3.715003 | -2.659540 | -0.566760 |
| H     | -3.761358 | -1.612349 | -2.002160 |
| H     | -5.273387 | -2.075213 | -1.190577 |
| O     | -4.125839 | -0.638925 | -0.179791 |
| Ba    | -3.979237 | 1.219689  | 1.171025  |

|          |           |           |           |
|----------|-----------|-----------|-----------|
| MeOBeCl2 |           |           |           |
| Be       | -2.128642 | 0.447934  | -1.801673 |
| Cl       | -0.843933 | -0.910794 | -2.477511 |
| Cl       | -2.205362 | 2.239125  | -2.719408 |
| O        | -3.024651 | 0.159791  | -0.637963 |
| C        | -4.003112 | 0.971303  | 0.001438  |
| H        | -4.997414 | 0.490197  | -0.043878 |
| H        | -3.754186 | 1.111997  | 1.069323  |
| H        | -4.086618 | 1.969350  | -0.462817 |

|         |           |           |          |
|---------|-----------|-----------|----------|
| MeOBeCl |           |           |          |
| C       | 0.073913  | -0.050401 | 0.383045 |
| H       | 0.431184  | -1.079495 | 0.248381 |
| H       | 0.396682  | 0.310821  | 1.368006 |
| H       | -1.023127 | -0.048469 | 0.346840 |



|    |          |          |           |
|----|----------|----------|-----------|
| O  | 0.595618 | 0.782754 | -0.635464 |
| Be | 1.108913 | 1.602494 | -1.637584 |
| Cl | 1.789342 | 2.689206 | -2.966184 |

#### MeOBe

|    |           |           |           |
|----|-----------|-----------|-----------|
| C  | -4.220250 | -1.693756 | -0.949233 |
| H  | -3.652230 | -2.505901 | -0.490009 |
| H  | -3.808131 | -1.437280 | -1.927747 |
| H  | -5.277121 | -1.957411 | -1.030598 |
| O  | -4.110715 | -0.524213 | -0.091827 |
| Be | -4.008494 | 0.566859  | 0.708083  |

#### MeOCaCl2

|    |           |           |           |
|----|-----------|-----------|-----------|
| Ca | -1.826069 | 0.675916  | -2.186124 |
| Cl | -0.958825 | -1.723641 | -3.060511 |
| Cl | -0.717129 | 2.871713  | -3.291975 |
| O  | -3.324891 | 0.829270  | -0.682207 |
| C  | -4.309841 | 0.932443  | 0.309249  |
| H  | -4.406114 | 0.005171  | 0.917543  |
| H  | -4.108890 | 1.756080  | 1.030785  |
| H  | -5.322160 | 1.131950  | -0.109249 |

#### MeOCaCl

|    |           |           |           |
|----|-----------|-----------|-----------|
| C  | -0.044480 | -0.216576 | 0.599757  |
| H  | 0.471920  | -1.193412 | 0.649814  |
| H  | 0.051751  | 0.252559  | 1.596753  |
| H  | -1.119103 | -0.425585 | 0.442072  |
| O  | 0.485853  | 0.606164  | -0.421165 |
| Ca | 1.268558  | 1.818840  | -1.927773 |
| Cl | 2.258026  | 3.364918  | -3.832418 |

#### MeOCa

|    |           |           |           |
|----|-----------|-----------|-----------|
| C  | -4.227526 | -1.758488 | -0.995854 |
| H  | -3.668722 | -2.607479 | -0.573686 |
| H  | -3.824140 | -1.550073 | -1.998413 |
| H  | -5.278592 | -2.064727 | -1.108487 |
| O  | -4.119608 | -0.609044 | -0.154515 |
| Ca | -3.958352 | 1.038107  | 1.049625  |

#### MeOMg

|    |           |           |           |
|----|-----------|-----------|-----------|
| C  | -4.224184 | -1.725939 | -0.972098 |
| H  | -3.662019 | -2.558672 | -0.533935 |
| H  | -3.818043 | -1.497405 | -1.964207 |
| H  | -5.277794 | -2.012092 | -1.069490 |
| O  | -4.113136 | -0.567144 | -0.124376 |
| Mg | -3.981765 | 0.809548  | 0.882774  |

#### MeOSrCl2

|    |           |           |           |
|----|-----------|-----------|-----------|
| Sr | -1.805435 | 0.674159  | -2.259382 |
| Cl | 0.287879  | -1.256879 | -2.089711 |
| Cl | -1.869079 | 2.392770  | -4.535770 |
| O  | -3.375232 | 0.835273  | -0.630448 |
| C  | -4.345299 | 0.934974  | 0.376729  |
| H  | -5.368468 | 1.124067  | -0.023311 |
| H  | -4.425308 | 0.010827  | 0.994775  |
| H  | -4.142976 | 1.763712  | 1.094630  |

#### MeOSrCl

|    |           |           |           |
|----|-----------|-----------|-----------|
| C  | -0.077869 | -0.260536 | 0.630680  |
| H  | 0.308769  | -1.297140 | 0.568416  |
| H  | 0.160909  | 0.107384  | 1.648281  |
| H  | -1.182105 | -0.328657 | 0.568076  |
| O  | 0.462409  | 0.570818  | -0.376642 |
| Sr | 1.313719  | 1.879740  | -1.963927 |
| Cl | 2.386692  | 3.535298  | -3.967843 |

#### MeOSr

|    |           |           |           |
|----|-----------|-----------|-----------|
| C  | -4.225458 | -1.775382 | -0.999505 |
| H  | -3.704907 | -2.636939 | -0.549408 |
| H  | -3.779706 | -1.598750 | -1.992457 |
| H  | -5.277883 | -2.065853 | -1.153937 |
| O  | -4.123392 | -0.619254 | -0.173008 |
| Sr | -3.965595 | 1.144476  | 1.086984  |

#### TS\_MeOBaCl2

|    |           |           |           |
|----|-----------|-----------|-----------|
| C  | -3.666823 | -1.830778 | -0.770793 |
| H  | -3.664905 | -2.862916 | -1.155382 |
| H  | -3.123366 | -1.056092 | -1.336207 |
| H  | -6.132323 | -0.159399 | -2.082255 |
| O  | -4.239765 | -1.561095 | 0.314322  |
| Ba | -5.267191 | 1.037392  | 0.000702  |
| Cl | -2.301653 | 1.449792  | -0.655657 |
| Cl | -6.885173 | 2.485106  | 2.140690  |

#### TS\_MeOBaCl

|    |           |           |           |
|----|-----------|-----------|-----------|
| C  | -4.132816 | -2.100720 | -0.794818 |
| H  | -4.482742 | -3.103599 | -0.507841 |
| H  | -4.003525 | -1.878639 | -1.861751 |
| H  | -5.406274 | 0.219078  | -2.199007 |
| O  | -3.894972 | -1.237377 | 0.087083  |
| Ba | -4.580863 | 1.379023  | -0.110493 |
| Cl | -4.009794 | 3.501482  | 1.930938  |

#### TS\_MeOBa

|    |           |           |           |
|----|-----------|-----------|-----------|
| C  | -4.036128 | -1.831508 | -0.779200 |
| H  | -4.907943 | -2.495995 | -0.730780 |
| H  | -3.388669 | -1.907951 | -1.661764 |
| H  | -5.451913 | 0.297570  | -1.748592 |
| O  | -3.749590 | -1.056889 | 0.177701  |
| Ba | -4.631459 | 1.377925  | 0.270172  |

#### TS\_MeOBeCl2

|    |           |           |           |
|----|-----------|-----------|-----------|
| C  | -4.088681 | -1.516339 | -0.647664 |
| H  | -5.030248 | -2.053248 | -0.868633 |
| H  | -3.378257 | -1.461340 | -1.493503 |
| H  | -4.872897 | -0.079841 | -1.350937 |
| O  | -3.694225 | -1.345404 | 0.557227  |
| Be | -4.717529 | 0.811570  | -0.261412 |
| Cl | -3.195402 | 2.071532  | -0.369684 |
| Cl | -6.303960 | 1.075079  | 0.890025  |

#### TS\_MeOBeCl

|    |           |           |           |
|----|-----------|-----------|-----------|
| C  | -5.131911 | -1.154194 | -0.684709 |
| O  | -4.703758 | -0.595349 | 0.386100  |
| Be | -4.676873 | 1.004492  | -0.169104 |
| Cl | -4.048350 | 2.377077  | 0.964641  |
| H  | -4.469137 | -1.808808 | -1.267529 |
| H  | -6.186361 | -1.103030 | -0.979042 |
| H  | -5.099950 | 0.943292  | -1.495810 |

#### TS\_MeOBe

|    |           |           |           |
|----|-----------|-----------|-----------|
| C  | -4.213078 | -1.451110 | -0.826752 |
| H  | -5.061478 | -2.133812 | -0.729903 |
| H  | -3.550607 | -1.548157 | -1.691020 |
| H  | -5.111559 | -0.026547 | -1.371103 |
| O  | -3.738676 | -0.829474 | 0.297798  |
| Be | -4.490305 | 0.372252  | -0.151484 |

#### TS\_MeOCaCl2

|    |           |           |           |
|----|-----------|-----------|-----------|
| C  | -3.780852 | -1.753003 | -0.722259 |
| H  | -3.835840 | -2.814042 | -1.011955 |
| H  | -3.295661 | -1.051861 | -1.416216 |
| H  | -5.885552 | -0.136980 | -1.859995 |
| O  | -4.213392 | -1.379020 | 0.397104  |
| Ca | -5.107994 | 0.914929  | -0.093983 |
| Cl | -2.533242 | 1.645704  | -0.651432 |
| Cl | -6.628666 | 2.076282  | 1.814154  |

#### TS\_MeOCaCl

|    |           |           |           |
|----|-----------|-----------|-----------|
| C  | -4.088910 | -1.915874 | -0.790134 |
| H  | -4.817590 | -2.727481 | -0.654291 |
| H  | -3.551380 | -1.872661 | -1.746128 |
| H  | -5.401392 | 0.218390  | -1.915453 |
| O  | -3.844337 | -1.107523 | 0.143047  |
| Ca | -4.618372 | 1.117812  | -0.116449 |
| Cl | -4.189005 | 3.066584  | 1.623517  |

#### TS\_MeOCa

|    |           |           |           |
|----|-----------|-----------|-----------|
| C  | -4.132467 | -1.637117 | -0.813479 |
| H  | -5.019300 | -2.278475 | -0.768160 |
| H  | -3.521803 | -1.698376 | -1.720779 |
| H  | -5.243403 | -0.016711 | -1.572577 |
| O  | -3.696559 | -1.033915 | 0.239065  |
| Ca | -4.552170 | 1.047747  | 0.163467  |

#### TS\_MeOMg

|    |           |           |           |
|----|-----------|-----------|-----------|
| C  | -4.195596 | -1.495783 | -0.826496 |
| H  | -5.054121 | -2.172245 | -0.763525 |
| H  | -3.561063 | -1.593493 | -1.713317 |
| H  | -5.132344 | -0.120986 | -1.461335 |
| O  | -3.699422 | -0.953281 | 0.284062  |
| Mg | -4.523156 | 0.718942  | 0.008149  |

#### TS\_MeOSrCl2

|   |           |           |           |
|---|-----------|-----------|-----------|
| C | -3.730439 | -1.787483 | -0.742054 |
| H | -3.756532 | -2.837149 | -1.073939 |
| H | -3.222944 | -1.050811 | -1.383340 |
| H | -5.998867 | -0.160534 | -1.952084 |

|    |           |           |           |
|----|-----------|-----------|-----------|
| O  | -4.224602 | -1.461029 | 0.366085  |
| Sr | -5.178381 | 0.971725  | -0.054622 |
| Cl | -2.421548 | 1.565716  | -0.664142 |
| Cl | -6.747886 | 2.261575  | 1.959516  |

#### TS\_MeOSrCl

|    |           |           |           |
|----|-----------|-----------|-----------|
| C  | -4.095404 | -2.005205 | -0.794033 |
| H  | -4.693415 | -2.907870 | -0.602465 |
| H  | -3.662106 | -1.884534 | -1.794935 |
| H  | -5.410345 | 0.241397  | -2.056473 |
| O  | -3.894604 | -1.165987 | 0.119564  |
| Sr | -4.622162 | 1.239596  | -0.110453 |
| Cl | -4.132949 | 3.261850  | 1.782905  |

#### TS\_MeOSr

|    |           |           |           |
|----|-----------|-----------|-----------|
| C  | -4.097923 | -1.709543 | -0.803256 |
| H  | -4.987955 | -2.347701 | -0.758092 |
| H  | -3.488136 | -1.766541 | -1.712290 |
| H  | -5.312859 | 0.070162  | -1.628944 |
| O  | -3.702009 | -1.053991 | 0.218345  |
| Sr | -4.576820 | 1.190766  | 0.211774  |

### Structures in Figure 9 (G4):

#### 7A

|    |           |           |           |
|----|-----------|-----------|-----------|
| C  | -4.099756 | -1.992151 | -1.217781 |
| H  | -3.868846 | -2.863708 | -0.595573 |
| H  | -3.344821 | -1.919000 | -2.008222 |
| H  | -5.078550 | -2.147321 | -1.684639 |
| O  | -4.108418 | -0.821436 | -0.438120 |
| Mg | -4.118802 | 0.605485  | 0.512790  |
| C  | -4.138416 | 3.231144  | 2.260486  |
| O  | -4.145543 | 4.178916  | 2.891117  |
| O  | -4.130989 | 2.243915  | 1.603590  |

#### 7B

|    |           |           |           |
|----|-----------|-----------|-----------|
| C  | 0.766586  | -1.510563 | 2.061310  |
| H  | 0.927988  | -2.506859 | 1.643470  |
| H  | 1.716323  | -1.085740 | 2.394142  |
| H  | 0.060313  | -1.557372 | 2.891638  |
| O  | 0.201705  | -0.664438 | 1.052573  |
| Mg | 0.237856  | 0.249339  | -0.716460 |
| Cl | 1.576732  | 0.414503  | -2.436377 |
| C  | -1.153571 | -0.042043 | 1.299927  |
| O  | -1.391979 | 0.642714  | 0.253371  |
| O  | -1.713455 | -0.271599 | 2.324208  |

#### 7C

|    |           |           |           |
|----|-----------|-----------|-----------|
| Mg | -2.118155 | 0.299635  | -1.436548 |
| Cl | -0.047962 | -0.628807 | -1.818891 |
| Cl | -3.216421 | 1.205345  | -3.288379 |
| O  | -3.026963 | 0.008622  | 0.125903  |
| C  | -4.154501 | 0.044808  | 0.897936  |
| H  | -5.048037 | 0.431283  | 0.364594  |
| H  | -4.441951 | -0.956371 | 1.283706  |
| H  | -4.038212 | 0.686643  | 1.797415  |

C -1.414463 3.388940 -1.932633  
O -1.300253 2.587282 -1.091696  
O -1.481835 4.239871 -2.716933

#### 7Cprime

Mg -1.925682 0.719207 -1.629557  
Cl 0.191276 -0.152653 -1.629033  
Cl -3.269976 0.617774 -3.480032  
O -2.976717 0.191082 0.116127  
C -3.627359 -0.762685 0.936193  
H -4.465255 -1.204832 0.386778  
H -2.918227 -1.550302 1.212231  
H -3.991768 -0.254160 1.831895  
C -2.904551 1.591708 0.564896  
O -2.283190 2.219995 -0.335718  
O -3.403001 1.891367 1.622361

#### 8A

C -4.196964 -0.169472 -2.327354  
H -3.277184 -0.736895 -2.523891  
H -5.074253 -0.331529 -2.968207  
O -4.243691 0.632687 -1.406599  
Mg -4.317164 1.900886 0.050085  
C -4.403922 3.377339 1.746857  
O -4.033140 3.758648 0.589743  
O -4.725611 2.161097 1.944467  
H -4.446159 4.095642 2.572315

#### 8B

C 1.040943 -0.031730 0.075150  
H 1.574105 -0.984296 0.217353  
H 0.895654 0.628190 0.944450  
H -2.761213 2.198740 0.859339  
O 0.620831 0.273024 -1.022397  
Mg -0.354044 2.032230 -1.586119  
Cl 0.749832 2.965047 -3.263199  
C -1.981904 2.142076 0.084452  
O -0.806827 2.524958 0.359095  
O -2.281572 1.693150 -1.058565

#### 8C

Mg -2.583467 0.351692 -1.849364  
Cl -1.438317 -1.635402 -1.631189  
Cl -4.821906 0.473625 -2.380553  
H -0.455096 3.140558 -3.614870  
C -0.861161 2.843508 -2.620088  
O -1.530081 1.759611 -2.643156  
O -0.624034 3.570388 -1.654075  
C -2.070030 2.050782 0.602816  
O -2.598956 1.045649 0.170347  
H -2.165861 2.281594 1.682468  
H -1.498802 2.735020 -0.055345

#### TS3A

C -3.876856 -1.325329 -2.506983  
H -2.935202 -1.736761 -2.887412

H -3.517721 0.117475 -2.963803  
H -4.748057 -1.374984 -3.169740  
O -4.060997 -1.261025 -1.242408  
Mg -3.912015 0.274053 -0.221098  
C -3.311692 1.320113 -2.741932  
O -3.035554 1.966042 -3.689790  
O -3.459204 1.555515 -1.487285

#### TS3B

C 0.411501 0.466119 0.457143  
H -0.039907 -0.526755 0.594590  
H 0.772538 0.953604 1.373910  
H -0.924200 1.166833 0.518514  
O 0.923232 0.771722 -0.656810  
Mg 0.299269 1.873123 -2.102383  
Cl 1.135530 2.437239 -4.048798  
C -1.766555 1.911773 -0.020113  
O -1.335801 2.267725 -1.147293  
O -2.739903 2.097606 0.642197

#### TS3C

Mg -1.893513 0.007204 -1.822734  
Cl 0.154754 -1.016706 -1.792026  
Cl -3.320404 -0.047678 -3.633510  
O -2.930876 -0.216846 -0.146382  
C -3.754051 0.638000 0.312662  
H -4.700652 0.825093 -0.226406  
H -3.847121 0.744330 1.409408  
H -3.244185 1.896419 0.100711  
C -2.408952 2.703711 -0.547745  
O -1.722571 1.997220 -1.278703  
O -2.575684 3.844407 -0.220900

#### Structures in Figure 10 (G4):

##### H2O

O -3.195900 2.218261 -0.012667  
H -2.234996 2.253641 0.020216  
H -3.470654 2.893648 0.615051

##### 10A

C -0.227519 -2.213623 0.755934  
H -1.223369 -2.630302 0.959752  
H 0.652014 -2.867600 0.830881  
H -0.064317 0.621303 -2.064588  
O -0.099884 -1.037966 0.448388  
Mg 0.112691 0.851500 0.069732  
O 0.339575 2.578004 0.200564  
H 0.474573 3.334281 0.766046  
H 0.036236 1.364402 -1.966707

##### 10B

C -0.115336 -2.404259 -1.212651  
H -0.353197 -3.478018 -1.274171  
H 0.412427 -1.901494 -2.036580  
H -0.387183 -0.002063 -4.740885

O -0.443127 -1.773853 -0.221835  
Mg -0.014162 0.259263 -0.082717  
O 0.730455 0.320930 -1.751861  
H 1.171219 1.039469 -2.202186  
H -0.162692 0.074884 -4.033455  
Cl -0.619554 1.200489 1.822357

#### 10C

C -0.111205 -2.417083 -1.125702  
H -0.265292 -1.737669 -1.983054  
H -0.076023 -3.516519 -1.263356  
H 0.733888 0.285321 -4.656540  
O 0.022006 -1.946932 -0.015032  
Mg -0.058376 0.260636 0.052223  
O -0.223942 0.350132 -1.848223  
H -1.025894 0.788637 -2.140537  
H 0.541831 0.312551 -3.928054  
Cl -2.057598 0.634777 1.185823  
Cl 1.984826 0.694443 1.050122

#### 11A

C -3.637686 -2.072896 -0.221385  
H -4.283598 -2.846192 0.215972  
H -2.837174 -2.368619 -0.912800  
O -3.806866 -0.894095 0.057711  
Mg -4.136823 0.938181 0.546102  
O -4.552309 2.529747 1.071984  
H -4.486727 3.477907 1.135163

#### 11B

C -0.482579 -2.065857 -1.609185  
H -0.863736 -3.072742 -1.842958  
H -0.027494 -1.442629 -2.393700  
O -0.568316 -1.643042 -0.468829  
Mg 0.149766 0.261279 -0.015760  
O 0.690407 0.574711 -1.727097  
H 1.113081 1.334827 -2.121809  
Cl -0.097864 0.846258 2.101419

#### 11C

C 0.107727 -2.088566 -1.610567  
H 0.039479 -1.250918 -2.329641  
H 0.197388 -3.140093 -1.952454  
O 0.083249 -1.845873 -0.421621  
Mg -0.071474 0.320319 0.029110  
O -0.014830 0.742010 -1.819605  
H -0.775524 1.239283 -2.126001  
Cl -2.196331 0.474131 0.978129  
Cl 1.828989 0.564868 1.336323

#### 9A

C -4.213345 -1.879604 -1.040172  
H -3.277191 -2.422721 -0.869464  
H -4.297081 -1.660808 -2.110522  
H -5.048379 -2.528051 -0.752525  
O -4.234815 -0.689458 -0.292388

Mg -4.260271 0.763245 0.623482  
O -4.290198 2.431650 1.673884  
H -4.291056 2.505268 2.640726  
H -4.306932 3.335086 1.322135

#### 9B

C -0.173194 -2.417131 -1.850794  
H -0.064192 -3.147466 -1.034390  
H 0.590802 -2.660366 -2.605768  
H -1.156497 -2.593220 -2.314525  
O -0.047027 -1.101524 -1.407127  
Mg 0.141981 0.107338 -0.044611  
O -0.138869 1.407776 -1.595286  
H 0.434088 2.080332 -1.974259  
H -0.126254 0.591380 -2.155136  
Cl 0.566360 0.734986 2.026566

#### 9C

C -0.060667 -2.483352 -1.770452  
H 0.259030 -3.181103 -0.972617  
H 0.563138 -2.726157 -2.654176  
H -1.096677 -2.773167 -2.039257  
O 0.047422 -1.162077 -1.403716  
Mg -0.111777 0.134037 -0.014112  
O 0.558747 1.275518 -1.730908  
H -0.299388 1.705962 -1.857416  
H 0.440205 0.347207 -2.079739  
Cl -2.152941 1.291931 0.028933  
Cl 1.165101 -0.016491 1.891702

#### TS4A

C -4.956992 -1.350564 -0.379886  
H -5.959288 -1.652957 -0.700673  
H -4.114501 -1.886943 -0.828721  
H -4.900621 -0.276655 -1.530329  
O -4.809578 -0.817205 0.769104  
Mg -4.555477 0.967023 1.178433  
O -4.567415 1.759101 -0.438148  
H -4.501745 2.561237 -0.957603  
H -4.780855 0.529789 -1.273848

#### TS4B

C -4.974734 -1.404007 -0.395920  
H -5.921372 -1.711992 -0.858082  
H -4.071629 -1.920051 -0.746165  
H -4.768979 -0.294060 -1.732679  
O -4.970657 -0.787749 0.683877  
Mg -4.803826 1.063830 1.266294  
O -4.632740 1.651095 -0.489443  
H -4.512421 2.458223 -0.986613  
H -4.706267 0.477753 -1.378691  
Cl -4.851166 1.789378 3.350903

#### TS4C

C -4.889795 -1.339472 -0.264164  
H -5.972119 -1.165244 -0.326677

|    |           |           |           |
|----|-----------|-----------|-----------|
| H  | -4.478860 | -2.139754 | -0.899507 |
| H  | -4.762344 | -0.199279 | -1.734711 |
| O  | -4.217777 | -0.870359 | 0.659232  |
| Mg | -4.639722 | 1.046227  | 1.314066  |
| O  | -4.460260 | 1.718992  | -0.515951 |
| H  | -5.215514 | 2.252005  | -0.781450 |
| H  | -4.635855 | 0.577892  | -1.328506 |
| Cl | -6.933090 | 0.951246  | 1.779865  |
| Cl | -3.102515 | 1.678158  | 2.908531  |

### Structures in Figure S6:

|    |           |           |          |
|----|-----------|-----------|----------|
| H2 |           |           |          |
| H  | 0.658739  | -1.588608 | 0.000000 |
| H  | -0.084056 | -1.588608 | 0.000000 |

|     |           |          |           |
|-----|-----------|----------|-----------|
| 12A |           |          |           |
| Mg  | -4.201360 | 3.037718 | 0.290551  |
| C   | -4.748543 | 3.211103 | 2.463269  |
| O   | -3.805811 | 3.922414 | 1.985216  |
| O   | -5.381131 | 2.401524 | 1.709838  |
| H   | -5.015155 | 3.295574 | 3.521902  |
| O   | -3.720159 | 2.885361 | -1.618328 |
| H   | -4.136119 | 2.303338 | -2.272604 |
| H   | -3.023371 | 3.378453 | -2.077892 |

|     |           |          |           |
|-----|-----------|----------|-----------|
| 12B |           |          |           |
| Mg  | -4.533271 | 3.196897 | 0.069324  |
| C   | -4.550603 | 3.115412 | 2.388918  |
| O   | -3.685034 | 3.831881 | 1.805311  |
| O   | -5.402305 | 2.446144 | 1.735857  |
| H   | -4.561922 | 3.073123 | 3.488010  |
| O   | -3.077848 | 1.970209 | -0.717929 |
| H   | -3.055285 | 2.167941 | -1.665791 |
| H   | -2.170525 | 1.923230 | -0.396786 |
| Cl  | -5.188186 | 3.986397 | -1.919896 |

|     |           |          |           |
|-----|-----------|----------|-----------|
| 12C |           |          |           |
| Mg  | -2.226909 | 4.950508 | 1.194298  |
| C   | -4.124967 | 3.620385 | 3.154169  |
| O   | -3.661281 | 3.977132 | 2.011286  |
| O   | -5.083835 | 2.914591 | 3.395084  |
| H   | -3.538888 | 4.039660 | 4.029606  |
| O   | -1.379899 | 5.705106 | 3.030569  |
| H   | -0.605164 | 5.131859 | 2.851205  |
| H   | -1.886727 | 5.250066 | 3.717198  |
| Cl  | -0.186196 | 3.758092 | 1.072583  |
| Cl  | -2.722421 | 6.578037 | -0.324731 |

|     |           |          |          |
|-----|-----------|----------|----------|
| 13A |           |          |          |
| Mg  | -2.290637 | 4.826130 | 2.857313 |
| C   | -4.872086 | 3.103222 | 2.232499 |
| O   | -3.919717 | 3.732636 | 2.550474 |
| O   | -5.788827 | 2.496886 | 1.932881 |
| H   | -2.337029 | 4.641091 | 4.984948 |
| O   | -0.877463 | 5.812287 | 2.597334 |

|   |           |          |          |
|---|-----------|----------|----------|
| H | -0.304617 | 6.249333 | 1.971394 |
| H | -1.726045 | 5.068761 | 4.853362 |

|     |           |          |           |
|-----|-----------|----------|-----------|
| 13B |           |          |           |
| Mg  | -1.867397 | 4.887062 | 1.036656  |
| C   | -4.357778 | 3.985464 | 2.204331  |
| O   | -3.733065 | 3.831077 | 1.215305  |
| O   | -5.036917 | 4.074367 | 3.126838  |
| H   | -1.772889 | 3.896926 | 5.547725  |
| O   | -2.237631 | 5.477179 | 2.714312  |
| H   | -1.835262 | 6.100405 | 3.315538  |
| H   | -1.903865 | 4.210922 | 4.884805  |
| Cl  | -0.813685 | 4.596260 | -0.869786 |

|     |           |          |           |
|-----|-----------|----------|-----------|
| 13C |           |          |           |
| Mg  | -2.000823 | 4.668712 | 0.353132  |
| C   | -3.250348 | 3.974873 | 2.472847  |
| O   | -3.423488 | 3.587719 | 1.283959  |
| O   | -3.775646 | 3.716476 | 3.533532  |
| H   | -2.911988 | 5.001369 | 6.204952  |
| O   | -2.163390 | 4.937919 | 2.460344  |
| H   | -1.993328 | 5.263455 | 3.348713  |
| H   | -3.156520 | 4.663816 | 5.583981  |
| Cl  | -0.075994 | 3.565157 | -0.193738 |
| Cl  | -2.706764 | 6.526340 | -0.775059 |

|     |           |           |           |
|-----|-----------|-----------|-----------|
| 14A |           |           |           |
| Mg  | 1.694651  | -0.691042 | -1.454305 |
| O   | 2.800699  | -1.466346 | -2.530770 |
| H   | 3.436386  | -2.141151 | -2.754113 |
| C   | -0.387668 | 0.963732  | 0.239977  |
| O   | -1.140357 | 1.567054  | 0.844110  |
| O   | 0.396963  | 0.334063  | -0.388524 |

|     |           |          |           |
|-----|-----------|----------|-----------|
| 14B |           |          |           |
| Mg  | -1.871656 | 4.892779 | 1.030770  |
| C   | -4.346571 | 3.992894 | 2.207112  |
| O   | -3.745515 | 3.847136 | 1.201984  |
| O   | -5.008087 | 4.067490 | 3.143901  |
| O   | -2.262268 | 5.498386 | 2.692086  |
| H   | -1.846729 | 6.073045 | 3.330745  |
| Cl  | -0.800910 | 4.580085 | -0.863404 |

|     |           |           |           |
|-----|-----------|-----------|-----------|
| 14C |           |           |           |
| Mg  | 0.550402  | 0.107967  | -2.030065 |
| C   | -0.723515 | -0.660010 | 0.046771  |
| O   | -0.964167 | -0.902316 | -1.169775 |
| O   | -1.239460 | -0.958052 | 1.097713  |
| O   | 0.470834  | 0.179597  | 0.087093  |
| H   | 0.691602  | 0.390063  | 0.998316  |
| Cl  | 2.328316  | -1.134441 | -2.756466 |
| Cl  | 0.034520  | 2.136006  | -2.953719 |

|     |           |          |          |
|-----|-----------|----------|----------|
| 15A |           |          |          |
| Mg  | -0.678981 | 0.665789 | 1.046856 |
| O   | -0.348521 | 2.358697 | 0.751125 |

|      |           |           |           |                    |            |            |            |
|------|-----------|-----------|-----------|--------------------|------------|------------|------------|
| H    | 0.267931  | 2.803935  | 0.164121  | Mg                 | 0.00000000 | 0.00000000 | 1.48265353 |
| 15B  |           |           |           | 4A_B3LYP_augccpVDZ |            |            |            |
| O    | -5.224571 | 1.622300  | 0.459988  | C                  | -4.208089  | -1.712563  | -0.938285  |
| H    | -6.149719 | 1.830752  | 0.548267  | H                  | -3.708923  | -2.655726  | -0.665944  |
| Mg   | -4.114357 | 0.367106  | -0.116921 | H                  | -3.821721  | -1.381819  | -1.911875  |
| Cl   | -2.682404 | -1.133607 | -0.805134 | H                  | -5.288140  | -1.898391  | -1.012613  |
| 15C  |           |           |           | O                  | -3.907768  | -0.775667  | 0.089343   |
| O    | -5.456636 | 0.971902  | 0.200239  | Mg                 | -4.142300  | 0.872463   | 0.658044   |
| H    | -6.008463 | 0.268595  | -0.146522 | 4A_B3LYP_augccpVQZ |            |            |            |
| Mg   | -3.630812 | 0.696861  | 0.064486  | C                  | -4.209909  | -1.714796  | -0.942494  |
| Cl   | -2.126472 | 2.250770  | 0.830350  | H                  | -3.705283  | -2.637382  | -0.649501  |
| Cl   | -2.851975 | -1.251490 | -0.895553 | H                  | -3.826447  | -1.400933  | -1.912647  |
| TS5A |           |           |           | H                  | -5.278245  | -1.912393  | -1.022347  |
| Mg   | -2.028499 | 4.800440  | 1.379446  | O                  | -3.938031  | -0.745869  | 0.057251   |
| C    | -4.065023 | 3.625236  | 2.955905  | Mg                 | -4.119026  | 0.859669   | 0.688408   |
| O    | -3.572308 | 3.807364  | 1.829784  | 4A_B3LYP_augccpVTZ |            |            |            |
| O    | -4.909261 | 3.133671  | 3.579915  | C                  | -4.209368  | -1.714999  | -0.941729  |
| H    | -3.182305 | 4.365211  | 3.947509  | H                  | -3.707551  | -2.642269  | -0.655907  |
| O    | -1.444249 | 5.419644  | 2.974187  | H                  | -3.825861  | -1.395122  | -1.910527  |
| H    | -0.797410 | 5.929661  | 3.468634  | H                  | -5.279447  | -1.907135  | -1.019165  |
| H    | -2.444956 | 4.839098  | 3.727416  | O                  | -3.927513  | -0.756466  | 0.068263   |
| TS5B |           |           |           | Mg                 | -4.127201  | 0.864288   | 0.677734   |
| Mg   | -1.869638 | 4.894720  | 1.275266  | 4A_B3LYP_ccpVDZ    |            |            |            |
| C    | -4.057624 | 3.622593  | 2.900595  | C                  | -4.208813  | -1.711038  | -0.938414  |
| O    | -3.487744 | 3.868879  | 1.860701  | H                  | -3.706528  | -2.656305  | -0.662665  |
| O    | -4.916096 | 3.119394  | 3.508278  | H                  | -3.820329  | -1.385271  | -1.917029  |
| H    | -3.182582 | 4.382298  | 4.071168  | H                  | -5.291239  | -1.903859  | -1.015312  |
| O    | -1.478085 | 5.402917  | 3.020772  | O                  | -3.911859  | -0.772675  | 0.085595   |
| H    | -0.837140 | 5.909413  | 3.519110  | Mg                 | -4.138173  | 0.877444   | 0.666494   |
| H    | -2.473713 | 4.826969  | 3.782390  | 4A_B3LYP_ccpVQZ    |            |            |            |
| Cl   | -1.234867 | 5.040177  | -0.822756 | C                  | -4.209333  | -1.714422  | -0.941217  |
| TS5C |           |           |           | H                  | -3.707372  | -2.640587  | -0.654327  |
| Mg   | -1.869195 | 5.050083  | 1.219916  | H                  | -3.826234  | -1.397151  | -1.910453  |
| C    | -4.113725 | 3.587000  | 2.884385  | H                  | -5.278464  | -1.908457  | -1.019768  |
| O    | -3.558445 | 3.868820  | 1.871026  | O                  | -3.930447  | -0.753525  | 0.064842   |
| O    | -4.923472 | 3.074873  | 3.560064  | Mg                 | -4.125090  | 0.862438   | 0.679592   |
| H    | -3.143630 | 4.451296  | 4.124817  | 4A_B3LYP_ccpVTZ    |            |            |            |
| O    | -1.535304 | 5.623737  | 3.048229  | C                  | -4.208679  | -1.713774  | -0.939922  |
| H    | -0.697741 | 5.284473  | 3.379457  | H                  | -3.709685  | -2.645321  | -0.661516  |
| H    | -2.482099 | 4.940883  | 3.766338  | H                  | -3.825677  | -1.391060  | -1.908271  |
| Cl   | -0.278271 | 3.500333  | 0.586740  | H                  | -5.279478  | -1.903508  | -1.016975  |
| Cl   | -2.835406 | 6.534139  | -0.239006 | O                  | -3.920550  | -0.764418  | 0.075723   |

**Structures in Table S5:**

|                      |             |             |             |
|----------------------|-------------|-------------|-------------|
| 4A_CCSD(T)_augccpVTZ |             |             |             |
| C                    | 0.00000000  | 0.00000000  | -1.64830149 |
| H                    | 0.72585757  | 0.72585757  | -2.01883800 |
| H                    | -0.99153988 | 0.26568231  | -2.01883800 |
| H                    | 0.26568231  | -0.99153988 | -2.01883800 |
| O                    | 0.00000000  | 0.00000000  | -0.23068994 |

|        |           |           |           |
|--------|-----------|-----------|-----------|
| 4A_M11 |           |           |           |
| C      | -4.223560 | -1.717504 | -0.966086 |
| H      | -3.664931 | -2.550991 | -0.533798 |
| H      | -3.819915 | -1.495340 | -1.956713 |
| H      | -5.272207 | -2.007080 | -1.066695 |
| O      | -4.114382 | -0.579003 | -0.133362 |

Mg -3.981947 0.798215 0.875324

4A\_MP2

C -4.223810 -1.721899 -0.969146  
H -3.666230 -2.548777 -0.535138  
H -3.820994 -1.496082 -1.953895  
H -5.268988 -2.006709 -1.066450  
O -4.114564 -0.580363 -0.134055  
Mg -3.982355 0.802127 0.877353

4A\_wb97xd

C -4.210326 -1.726457 -0.949058  
H -3.647933 -2.547911 -0.504541  
H -3.805818 -1.521121 -1.940449  
H -5.252224 -2.030609 -1.051967  
O -4.116990 -0.580981 -0.140280  
Mg -4.004182 0.802915 0.841620

5A\_CCSD(T)\_augccpVTZ

Mg 0.00000000 0.00000000 1.40429945  
C 0.00000000 0.00000000 -1.79105657  
H 0.00000000 0.94568889 -2.34074911  
H 0.00000000 -0.94568889 -2.34074911  
O 0.00000000 0.00000000 -0.56217775  
H 0.00000000 0.00000000 3.07366635

5A\_B3LYP\_augccpVDZ

C -3.897411 -1.925370 -0.870497  
H -4.335538 -2.890462 -0.564817  
H -3.209676 -1.893420 -1.732357  
H -4.981116 2.138437 1.549266  
O -4.172279 -0.897675 -0.257868  
Mg -4.610283 0.745551 0.720078

5A\_B3LYP\_augccpVQZ

C -3.899473 -1.917824 -0.865973  
H -4.333497 -2.876067 -0.563760  
H -3.217327 -1.887262 -1.721362  
H -4.976240 2.119159 1.537291  
O -4.172700 -0.896190 -0.256690  
Mg -4.607066 0.735245 0.714299

5A\_B3LYP\_augccpVTZ

C -3.898623 -1.921052 -0.867876  
H -4.332917 -2.879475 -0.565247  
H -3.216220 -1.890045 -1.723527  
H -4.978149 2.126149 1.541181  
O -4.172319 -0.898149 -0.257896  
Mg -4.608075 0.739633 0.717170

5A\_B3LYP\_ccpVDZ

C -3.896841 -1.927454 -0.871744  
H -4.336475 -2.895776 -0.564987  
H -3.206746 -1.895424 -1.736484  
H -4.982237 2.142850 1.552088  
O -4.171998 -0.898787 -0.258637

Mg -4.612006 0.751652 0.723570

5A\_B3LYP\_ccpVQZ

C -3.898991 -1.919635 -0.867059  
H -4.333008 -2.877888 -0.564832  
H -3.216836 -1.889123 -1.722455  
H -4.977475 2.123765 1.540047  
O -4.172186 -0.898069 -0.257845  
Mg -4.607807 0.738011 0.715948

5A\_B3LYP\_ccpVTZ

C -3.898456 -1.921447 -0.868118  
H -4.332996 -2.879814 -0.565457  
H -3.216068 -1.890570 -1.723860  
H -4.978472 2.127248 1.542238  
O -4.171902 -0.898556 -0.258177  
Mg -4.608409 0.740201 0.717179

5A\_M11

C -3.898418 -1.921228 -0.868085  
H -4.336843 -2.880632 -0.561113  
H -3.213916 -1.887814 -1.726712  
H -4.980213 2.129567 1.543446  
O -4.169873 -0.899674 -0.259545  
Mg -4.607039 0.736842 0.715815

5A\_MP2

C -3.896056 -1.930543 -0.873514  
H -4.331055 -2.883261 -0.568507  
H -3.215912 -1.895071 -1.725616  
H -4.981799 2.140179 1.549654  
O -4.170728 -0.902930 -0.260557  
Mg -4.610754 0.748688 0.722346

5A\_wb97xd

C -3.898365 -1.920880 -0.868115  
H -4.334345 -2.877429 -0.562654  
H -3.215980 -1.891391 -1.723593  
H -4.979428 2.126497 1.544322  
O -4.169784 -0.899902 -0.262442  
Mg -4.608401 0.740166 0.716286

6A\_CCSD(T)\_ccpVTZ

H 0.00000000 0.00000000 1.53793063  
Mg 0.00000000 0.00000000 -0.13317603

6A\_B3LYP\_augccpVDZ

H 1.383057 0.117105 0.000000  
Mg -0.279965 0.158681 0.000000

6A\_B3LYP\_augccpVQZ

H 1.377860 0.117235 0.000000  
Mg -0.274768 0.158551 0.000000

6A\_B3LYP\_augccpVTZ

H 1.379350 0.117198 0.000000

Mg -0.276258 0.158588 0.000000

6A\_B3LYP\_ccpVDZ

H 1.383819 0.117086 0.000000  
Mg -0.280727 0.158700 0.000000

6A\_B3LYP\_ccpVQZ

H 1.378703 0.117214 0.000000  
Mg -0.275611 0.158572 0.000000

6A\_B3LYP\_ccpVTZ

H 1.380386 0.117172 0.000000  
Mg -0.277294 0.158614 0.000000

6A\_M11

H 1.377578 0.117242 0.000000  
Mg -0.274486 0.158544 0.000000

6A\_MP2

H 1.379350 0.117198 0.000000  
Mg -0.276258 0.158588 0.000000

6A\_wb97xd

H 1.376141 0.117278 0.000000  
Mg -0.273049 0.158508 0.000000

TS2A\_CCSD(T)\_augccpVTZ

C -0.37759394 1.14380148 0.00000000  
H -0.80385767 1.53573667 -0.92644938  
H -0.80385767 1.53573667 0.92644938  
H -1.56151791 -0.26900965 0.00000000  
O 0.75925510 0.54925782 0.00000000  
Mg -0.04620868 -1.14632746 0.00000000

TS2A\_B3LYP\_augccpVDZ

C -4.188377 -1.477496 -0.804022  
H -5.062630 -2.144122 -0.754609  
H -3.565355 -1.563814 -1.707094  
H -5.131753 -0.129738 -1.465806  
O -3.691159 -0.978160 0.281806  
Mg -4.526428 0.676481 -0.022738

TS2A\_B3LYP\_augccpVQZ

C -4.187316 -1.475905 -0.801378  
H -5.055911 -2.135463 -0.755669  
H -3.572465 -1.560480 -1.699357  
H -5.129522 -0.130481 -1.462726  
O -3.695337 -0.977844 0.275468  
Mg -4.525151 0.663326 -0.028801

TS2A\_B3LYP\_augccpVTZ

C -4.188257 -1.474762 -0.802147  
H -5.056991 -2.134801 -0.756060  
H -3.572827 -1.559475 -1.700222  
H -5.128511 -0.134305 -1.463464  
O -3.693377 -0.979630 0.277511

Mg -4.525739 0.666125 -0.028081

TS2A\_B3LYP\_ccpVDZ

C -4.196108 -1.465047 -0.808604  
H -5.068260 -2.141358 -0.760236  
H -3.569726 -1.560610 -1.713532  
H -5.112737 -0.162143 -1.455698  
O -3.692647 -0.973436 0.282298  
Mg -4.526224 0.685747 -0.016692

TS2A\_B3LYP\_ccpVQZ

C -4.187924 -1.474937 -0.801744  
H -5.056203 -2.134878 -0.756033  
H -3.572971 -1.559983 -1.699584  
H -5.128468 -0.133329 -1.462811  
O -3.695224 -0.977835 0.275646  
Mg -4.524913 0.664114 -0.027937

TS2A\_B3LYP\_ccpVTZ

C -4.189672 -1.472523 -0.803036  
H -5.057286 -2.134176 -0.756801  
H -3.573636 -1.559178 -1.700623  
H -5.126184 -0.138883 -1.462644  
O -3.693859 -0.978283 0.277461  
Mg -4.525065 0.666195 -0.026819

TS2A\_M11

C -4.165438 -1.508339 -0.786929  
H -5.053657 -2.149157 -0.743240  
H -3.556175 -1.569425 -1.696072  
H -5.167557 -0.063052 -1.482120  
O -3.689665 -0.996229 0.272488  
Mg -4.533210 0.669354 -0.036590

TS2A\_MP2

C -4.169897 -1.502917 -0.790442  
H -5.053359 -2.140328 -0.749605  
H -3.565801 -1.563704 -1.695891  
H -5.155916 -0.086155 -1.477155  
O -3.684762 -1.000846 0.278130  
Mg -4.535967 0.677103 -0.037500

TS2A\_wb97xd

C -4.172669 -1.495947 -0.790412  
H -5.052680 -2.141768 -0.748704  
H -3.564767 -1.564462 -1.695403  
H -5.154510 -0.088805 -1.476662  
O -3.691318 -0.991975 0.273536  
Mg -4.529757 0.666109 -0.034817

**Structures in Table S6 (B3LYP/LANDL2DZ):**

BeCl2

Cl -1.155486 -0.858876 -0.759320  
Cl 2.487315 -0.605124 -0.609175  
Be 0.665914 -0.732001 -0.684248



MgCl<sub>2</sub>

|    |           |           |           |
|----|-----------|-----------|-----------|
| Cl | -1.559553 | -0.859940 | -0.749755 |
| Cl | 2.891382  | -0.604062 | -0.618740 |
| Mg | 0.665914  | -0.731999 | -0.684246 |

CaCl<sub>2</sub>

|    |           |           |           |
|----|-----------|-----------|-----------|
| Cl | -1.954661 | -0.882644 | -0.761376 |
| Cl | 3.286490  | -0.581356 | -0.607118 |
| Ca | 0.665914  | -0.732000 | -0.684247 |

SrCl<sub>2</sub>

|    |           |           |           |
|----|-----------|-----------|-----------|
| Cl | -2.117703 | -0.892037 | -0.766194 |
| Cl | 3.449532  | -0.571964 | -0.602300 |
| Sr | 0.665914  | -0.732000 | -0.684247 |

BaCl<sub>2</sub>

|    |           |           |           |
|----|-----------|-----------|-----------|
| Cl | -2.300405 | -0.902543 | -0.771573 |
| Cl | 3.632233  | -0.561458 | -0.596921 |
| Ba | 0.665914  | -0.732000 | -0.684247 |

HCO<sub>2</sub><sup>-</sup>

|   |           |          |           |
|---|-----------|----------|-----------|
| C | -0.287064 | 0.798371 | -0.015416 |
| H | 0.382337  | 0.174227 | 0.654671  |
| O | -0.632619 | 1.943272 | 0.471103  |
| O | -0.586513 | 0.254860 | -1.147598 |
